# 1 Genetic landscapes reveal how human genetic 2 diversity aligns with geography

3 Benjamin Marco Peter<sup>1</sup>, Desislava Petkova<sup>2,3</sup> & John Novembre<sup>1,4</sup>

4<sup>1</sup> Department of Human Genetics, University of Chicago <sup>2</sup> Wellcome Trust Center for Human Genetics, University of  
5 Oxford, UK <sup>3</sup> Present Address: Procter & Gamble, Brussels, Belgium <sup>4</sup> Department of Ecology & Evolution, University  
6 of Chicago

7

8 **Geographic patterns in human genetic diversity carry footprints of population history<sup>1,2</sup>**

9 **and need to be understood to carry out global biomedicine<sup>3,4</sup>. Summarizing and visually**  
10 **representing these patterns of diversity has been a persistent goal for human**  
11 **geneticists<sup>5-9</sup>. However, most analytical methods to represent population structure<sup>10-14</sup> do**  
12 **not incorporate geography directly, and it must be considered *post hoc* alongside a**  
13 **visual summary. Here, we use a recently developed spatially explicit method to estimate**  
14 **“effective migration” surfaces to visualize how human genetic diversity is geographically**  
15 **structured (the EEMS method<sup>15</sup>). The resulting surfaces are “rugged”, which indicates**  
16 **the relationship between genetic and geographic distance is heterogenous and distorted**  
17 **as a rule. Most prominently, topographic and marine features regularly align with**  
18 **increased genetic differentiation (e.g. the Sahara Desert, Mediterranean Sea or Himalaya**  
19 **at large scales; the Adriatic, inter-island straits in near Oceania at smaller scales). We**  
20 **also see traces of historical migrations and boundaries of language families. These**  
21 **results provide visualizations of human genetic diversity that reveal local patterns of**  
22 **differentiation in detail and emphasize that while genetic similarity generally decays with**  
23 **geographic distance, there have regularly been factors that subtly distort the underlying**  
24 **relationship across space observed today. The fine-scale population structure depicted**  
25 **here is relevant to understanding complex processes of human population history and**  
26 **may provide insights for geographic patterning in rare variants and heritable disease**  
27 **risk.**

28

29 In many regions of the world, genetic diversity “mirrors” geography in the sense that genetic  
30 differentiation increases with geographic distance (“isolation by distance”<sup>16-18</sup>); However, due to  
31 the complexities of geography and history, this relationship is not one of constant proportionality.  
32 The recently developed analysis method EEMS visualizes how the isolation-by-distance  
33 relationship varies across geographic space<sup>15</sup>. Specifically, it uses a model based on a local  
34 “effective migration” rate. For several reasons, the effective migration rates inferred by EEMS  
35 do not directly represent levels of gene flow<sup>15</sup>; however they are useful for conveying spatial  
36 population structure: high values of effective migration reflect genetic isolation accrues gradually  
37 with distance, and low values imply isolation accrues rapidly with distance. In turn, a map of  
38 inferred patterns of effective migration can provide a compact visualization of spatial genetic  
39 structure for large, complex samples.

40

41 We apply EEMS on a combination of 26 existing single nucleotide polymorphism (SNP)  
42 datasets. In total, these comprise 5372 individuals from 348 locations across Eurasia and Africa  
43 (Extended Data Table 1), which we organize in six analysis panels: an overview Afro-Eurasian  
44 panel (AEA), four continental-scale panels, and a panel of Southern African Hunter-Gatherers.  
45 As our focus is on isolation-by-distance patterns, we identified samples that are known to be  
46 admixed from distant sources, significantly displaced, and/or from hunter-gatherer groups, as  
47 these *a priori* should not fit an isolation-by-distance model. These samples are labelled on the  
48 EEMS maps, but were not included in the model fit (see Methods and Table S1). For all  
49 analysis panels, the inferred EEMS surfaces are “rugged”, with numerous high and low effective  
50 migration features (Fig 1a, Fig 2) that are strongly statistically supported when compared to a  
51 uniform-migration model (Extended Data Table 2). The regions of depressed effective migration  
52 often align in long, connected stretches that are present in more than 95% of MCMC iterations.  
53 To facilitate discussion, we annotate these stretches with dashed lines and refer to them as  
54 “troughs” of effective migration (Figs. 1a, 2, Extended Data Figs. 2-4). Conversely,  
55 intermediate- and high-migration areas between troughs are referred to as corridors.

56

57 In the broad overview Afro-Eurasia panel (Fig. 1;  $n=4,002$  samples; 219 locales;  $F_{ST} = 0.061$ ) we  
58 see that troughs often align with topographical obstacles to migration, such as deserts (Sahara),  
59 seas (Mediterranean, Red, Black, Caspian, South China Seas) and mountain ranges (Ural,  
60 Himalayas, Caucasus). None of these troughs completely surround large regions, as corridors  
61 intersperse among them. Among the main features are several large regions that have mostly  
62 high effective migration, such as Europe, East Asia, Sub-Saharan Africa and Siberia. Several  
63 large-scale corridors are inferred that represent long-range genetic similarity, for example: India  
64 is connected by two corridors to Europe (a southern one through Anatolia and Persia ‘SC’, and  
65 a northern one through the Eurasian Steppe ‘NC’); East Asia (EA) is connected to Siberia and to  
66 southeast Asia and Oceania. The island populations of the Andaman islands (Onge) and New  
67 Guinea, as well as the populations of far northeastern Siberia, show troughs nearly contiguously  
68 around them – possibly reflecting a history of relative isolation [19-21](#).

69

70 Analyses on a finer geographic scale highlights subtler features (e.g. compare Europe in Fig. 1  
71 vs Fig. 2a). At these finer scales we continue to see troughs that align with landscape features,  
72 though increasingly we see troughs and corridors that coincide with historical contact zones of  
73 language groups and proposed areas of human migrations. For example, in Europe (Fig. 2b)  
74 we observe troughs (NS, CE) roughly between where Northern Slavic speaking peoples  
75 currently reside relative to west Germanic speakers, and relative to the linguistically complex  
76 Caucasus region. In India (Fig. 2e), troughs demarcate regions with samples of Austroasiatic  
77 and Dravidian speakers, as well as central India (CI) relative to Northwestern India (Sindhi,  
78 Punjabi) and Pakistan. In Southeast Asia (Fig. 2k), troughs align with several straits in the Malay  
79 Archipelago, but we also observe a corridor from Taiwan through Luzon to the Lower Sunda  
80 Islands (LSI), and further to Melanesia, perhaps reflecting the Austronesian expansion. In Sub-  
81 Saharan Africa (Fig. 2g), we find corridors perhaps reflecting the Bantu expansion from West-  
82 into Southern and Eastern Africa, where contact with Nilo-Saharan speakers resulted in  
83 complex local structure. In Southern Africa, the structures in Bantu and Khoe-San speakers

84(Fig. 2g/h) appear entirely uncorrelated, illustrating that in some cases, different language  
85groups can maintain independent genetic structure in the same geographic region.

86

87We contrast EEMS with principal component analysis (PCA), a widely used, non-spatial method  
88for visualizing population structure. Quantitatively, performance is evaluated by comparing the fit  
89of EEMS and PCA (using the first 10 components) to the observed genetic distances. EEMS  
90performs better for small-scale panels, but PCA provides a better fit on the larger-scale AEA and  
91CEA panels (Extended Data Figure 5). We hypothesize EEMS tends to represent local genetic  
92differences relatively well, and this is supported by an analysis where we stratify the residuals of  
93genetic distances (Fig. 3): In most panels EEMS fits best in the lowest percentiles  
94(corresponding to local differences), and the fit quality tends to decrease for larger genetic  
95distances. Qualitatively, we find repeatedly that the PCA-biplots mirror large-scale geography by  
96reflecting the strongest gradients of diversity in a panel, such as the Out-of-Africa expansion in  
97the AEA panel (Fig. 1b), the circum-Mediterranean and circum-Saharan distribution of diversity  
98in Western Eurasia and Africa, respectively, and gradients from Europe into East Asia and South  
99Asia in the Central/Eastern Eurasian panel (Fig. 2). PCA easily identifies outlier or admixed  
100individuals (e.g. in Africa) that are not made apparent in EEMS but which are revealed when  
101exploring model fit. Isolate populations such as the Sardinians and Basques strongly shape the  
102PCA results (compare Fig. 2d to e.g. ref <sup>16</sup>), whereas they are simply placed in low-migration  
103regions in EEMS. Also, many of the fine-scale distortions identified by EEMS are not directly  
104apparent in the PCA-biplots. There are two likely reasons: first, using geographical information  
105allows EEMS to discern subtle structure from effects of uneven sampling<sup>15</sup>. A second reason is  
106how EEMS emphasizes local features - some patterns missing in the PCA-biplots may possibly  
107be teased out in PCA by either investigating higher PCs, or by focusing analysis on an  
108appropriate subset of the data.

109

110Overall, the maps we present provide a compact summary of the complex relationship of genes  
111and geography in human populations. In contrast to methods that identify short bursts of gene  
112flow (“admixture”) between diverged populations<sup>22–24</sup>, EEMS models the local migration  
113expected between nearby groups as a tool to represent heterogeneous isolation-by-distance  
114patterns. This leads to the first of a few limitations that must be considered in interpretation:  
115Processes that lead to non-spatial patterns of differentiation are not efficiently modelled in the  
116EEMS framework, and resulted in the exclusion of 6.8% of samples (hunter-gatherers, admixed  
117and displaced groups). Second, the results need interpretation in light of the sampling  
118configuration. When there is a feature inferred in a region with few samples, the exact  
119positioning of the inferred change on the map will be imprecise (e.g. the trough presumably  
120associated with the English Channel in Fig 2b). The maps of posterior variance (Extended Data  
121Figures 2 and 4) partly convey where there is uncertainty in positioning, but caution is still  
122warranted as the modelling assumptions will introduce further uncertainty. Third, the maps  
123inferred here represent a model of gene flow that predicts genetic diversity in humans sampled  
124today – a fuller representation would represent genetic structure dynamically through time. This  
125is especially relevant as ancient DNA data have recently suggested human population structure  
126can be surprisingly dynamic (e.g. ref. <sup>25</sup>). Finally, the effective migration rates and their scales  
127needs be interpreted with care. Low effective migration between a pair of populations does not

128 imply an absence of migration nor large levels of absolute differentiation. In each of our maps  
129 the overall levels of differentiation are consistently low across all populations.

130

131 Nonetheless, the maps presented here provide a useful representation of human genetic  
132 diversity, that complements results from geography-agnostic methods. Our results emphasize  
133 the importance of geographical features on shaping human genetic history and help explain  
134 fine-scale patterns of human genetic diversity<sup>26</sup>. By using recent large-scale SNP data and a  
135 novel analysis method, our work expands beyond previous studies of gene flow barriers in  
136 humans<sup>27–29</sup>. Our rugged migration landscapes suggest a synthesis of the clusters versus clines  
137 paradigms for human structure<sup>6,7,30</sup>: By revealing both sharp and diffuse features that structure  
138 human genetic diversity, our results suggest that more continuous definitions of ancestry in  
139 human population genetics should complement models of discrete populations with admixture.  
140 As rare disease variants are commonly geographically localized<sup>31</sup>, the maps presented here  
141 may help predict regions where clustering of alleles should be expected. They also annotate  
142 present-day population structure that ancient DNA and historical/archaeological studies should  
143 aim to explain.

144

## 145 References

- 146 1. [Veeramah, K. R. & Hammer, M. F. The impact of whole-genome sequencing on the reconstruction of human population](#)  
147 [history. \*Nat. Rev. Genet.\* \*\*15\*\*, 149–162 \(2014\).](#)
- 148 2. [Schraiber, J. G. & Akey, J. M. Methods and models for unravelling human evolutionary history. \*Nat. Rev. Genet.\* \*\*16\*\*, 727–](#)  
149 [740 \(2015\).](#)
- 150 3. [Bustamante, C. D., Burchard, E. G. & De la Vega, F. M. Genomics for the world. \*Nature\* \*\*475\*\*, 163–165 \(2011\).](#)
- 151 4. [Popejoy, A. B. & Fullerton, S. M. Genomics is failing on diversity. \*Nature\* \*\*538\*\*, 161–164 \(2016\).](#)
- 152 5. [Roberts, L. How to sample the world's genetic diversity. \*Science\* \*\*257\*\*, 1204–1205 \(1992\).](#)
- 153 6. [Rosenberg, N. A. \*et al.\* Genetic structure of human populations. \*Science\* \*\*298\*\*, 2381–2385 \(2002\).](#)
- 154 7. [Serre, D. & Pääbo, S. Evidence for gradients of human genetic diversity within and among continents. \*Genome Res.\* \*\*14\*\*,](#)  
155 [1679–1685 \(2004\).](#)
- 156 8. [International HapMap Consortium. A haplotype map of the human genome. \*Nature\* \*\*437\*\*, 1299–1320 \(2005\).](#)
- 157 9. [The 1000 Genomes Project Consortium. A global reference for human genetic variation. \*Nature\* \*\*526\*\*, 68–74 \(2015\).](#)
- 158 10. [Pritchard, J. K., Stephens, M. & Donnelly, P. Inference of population structure using multilocus genotype data. \*Genetics\*](#)  
159 [155, 945–959 \(2000\).](#)
- 160 11. [Pickrell, J. K. & Pritchard, J. K. Inference of population splits and mixtures from genome-wide allele frequency data. \*PLoS\*](#)  
161 [Genet.](#) **8**, e1002967 (2012).
- 162 12. [Patterson, N., Price, A. L. & Reich, D. Population structure and eigenanalysis. \*PLoS Genet.\* \*\*2\*\*, e190 \(2006\).](#)
- 163 13. [Lawson, D. J., Hellenthal, G., Myers, S. & Falush, D. Inference of population structure using dense haplotype data. \*PLoS\*](#)  
164 [Genet.](#) **8**, e1002453 (2012).
- 165 14. [Lipson, M. \*et al.\* Efficient moment-based inference of admixture parameters and sources of gene flow. \*Mol. Biol. Evol.\* \*\*30\*\*,](#)

- 166 [1788–1802 \(2013\).](#)
- 167 15. [Petkova, D., Novembre, J. & Stephens, M. Visualizing spatial population structure with estimated effective migration](#)
- 168 [surfaces. \*Nat. Genet.\* \*\*48\*\*, 94–100 \(2016\).](#)
- 169 16. [Novembre, J. \*et al.\* Genes mirror geography within Europe. \*Nature\* \*\*456\*\*, 98–101 \(2008\).](#)
- 170 17. [Ramachandran, S. \*et al.\* Support from the relationship of genetic and geographic distance in human populations for a](#)
- 171 [serial founder effect originating in Africa. \*Proc. Natl. Acad. Sci. U. S. A.\* \*\*102\*\*, 15942–15947 \(2005\).](#)
- 172 18. [Wang, C., Zöllner, S. & Rosenberg, N. A. A Quantitative Comparison of the Similarity between Genes and Geography in](#)
- 173 [Worldwide Human Populations. \*PLoS Genet.\* \*\*8\*\*, e1002886 \(2012\).](#)
- 174 19. [Reich, D., Thangaraj, K., Patterson, N., Price, A. L. & Singh, L. Reconstructing Indian population history. \*Nature\* \*\*461\*\*, 489–](#)
- 175 [494 \(2009\).](#)
- 176 20. [Pugach, I., Delfin, F., Gunnarsdóttir, E., Kayser, M. & Stoneking, M. Genome-wide data substantiate Holocene gene flow](#)
- 177 [from India to Australia. \*Proc. Natl. Acad. Sci. U. S. A.\* \*\*110\*\*, 1803–1808 \(2013\).](#)
- 178 21. [Pugach, I. \*et al.\* The Complex Admixture History and Recent Southern Origins of Siberian Populations. \*Mol. Biol. Evol.\* \*\*33\*\*,](#)
- 179 [1777–1795 \(2016\).](#)
- 180 22. [Patterson, N. J. \*et al.\* Ancient Admixture in Human History. \*Genetics\* genetics.112.145037 \(2012\).](#)
- 181 23. [Loh, P.-R. \*et al.\* Inferring admixture histories of human populations using linkage disequilibrium. \*Genetics\* \*\*193\*\*, 1233–1254](#)
- 182 [\(2013\).](#)
- 183 24. [Hellenthal, G. \*et al.\* A Genetic Atlas of Human Admixture History. \*Science\* \*\*343\*\*, 747–751 \(2014\).](#)
- 184 25. [Lazaridis, I. \*et al.\* Ancient human genomes suggest three ancestral populations for present-day Europeans. \*Nature\* \*\*513\*\*,](#)
- 185 [409–413 \(2014\).](#)
- 186 26. [Baker, J. L., Rotimi, C. N. & Shriner, D. Human ancestry correlates with language and reveals that race is not an objective](#)
- 187 [genomic classifier. \*Sci. Rep.\* \*\*7\*\*, 1572 \(2017\).](#)
- 188 27. [Barbujani, G. & Sokal, R. R. Zones of sharp genetic change in Europe are also linguistic boundaries. \*Proc. Natl. Acad.\*](#)
- 189 [Sci. U. S. A. \*\*87\*\*, 1816–1819 \(1990\).](#)
- 190 28. [Barbujani, G. & Belle, E. M. S. Genomic boundaries between human populations. \*Hum. Hered.\* \*\*61\*\*, 15–21 \(2006\).](#)
- 191 29. [Pagani, L. \*et al.\* Genomic analyses inform on migration events during the peopling of Eurasia. \*Nature\* \*\*538\*\*, 238–242](#)
- 192 [\(2016\).](#)
- 193 30. [Rosenberg, N. A. \*et al.\* Clines, clusters, and the effect of study design on the inference of human population structure.](#)
- 194 [PLoS Genet. \*\*1\*\*, e70 \(2005\).](#)
- 195 31. [Mathieson, I. & McVean, G. Demography and the age of rare variants. \*PLoS Genet.\* \*\*10\*\*, e1004528 \(2014\).](#)

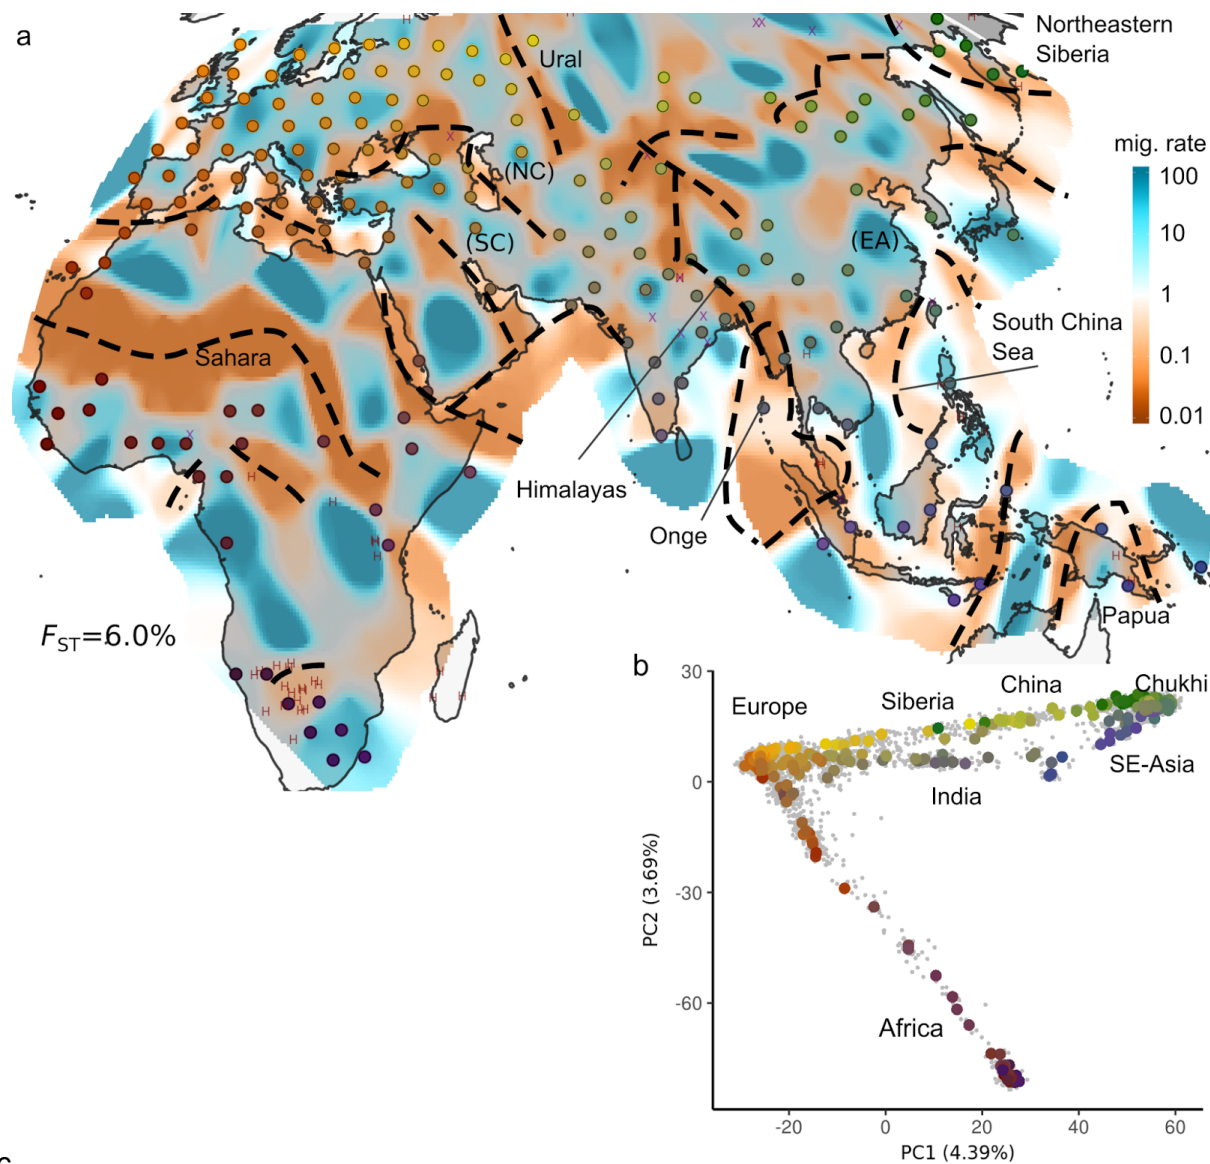

196

197 **Figure 1: Large-scale patterns of population structure.** **a:** EEMS posterior mean effective migration surface for  
 198 Afro-Eurasia (AEA) panel. 'X' marks locations of samples excluded as displaced or recently admixed. 'H' marks  
 199 locations of excluded hunter-gatherer populations. Regions and features discussed in the main text are labeled.  
 200 Approximate locations of troughs are annotated with dashed lines (see Extended Data Figure 4). **b:** PCA plot of AEA  
 201 panel: Individuals are displayed as grey dots, colored dots reflect median of sample locations; with colors reflecting  
 202 geography and matching with the EEMS plot. Locations displayed in the EEMS plot reflect the position of populations  
 203 after alignment to grid vertices used in the model (see methods). For exact locations, see annotated Extended Data  
 204 Figure 2 and Table S1. The displayed value of  $F_{ST}$  emphasizes the low absolute level of differentiation in human SNP  
 205 data.

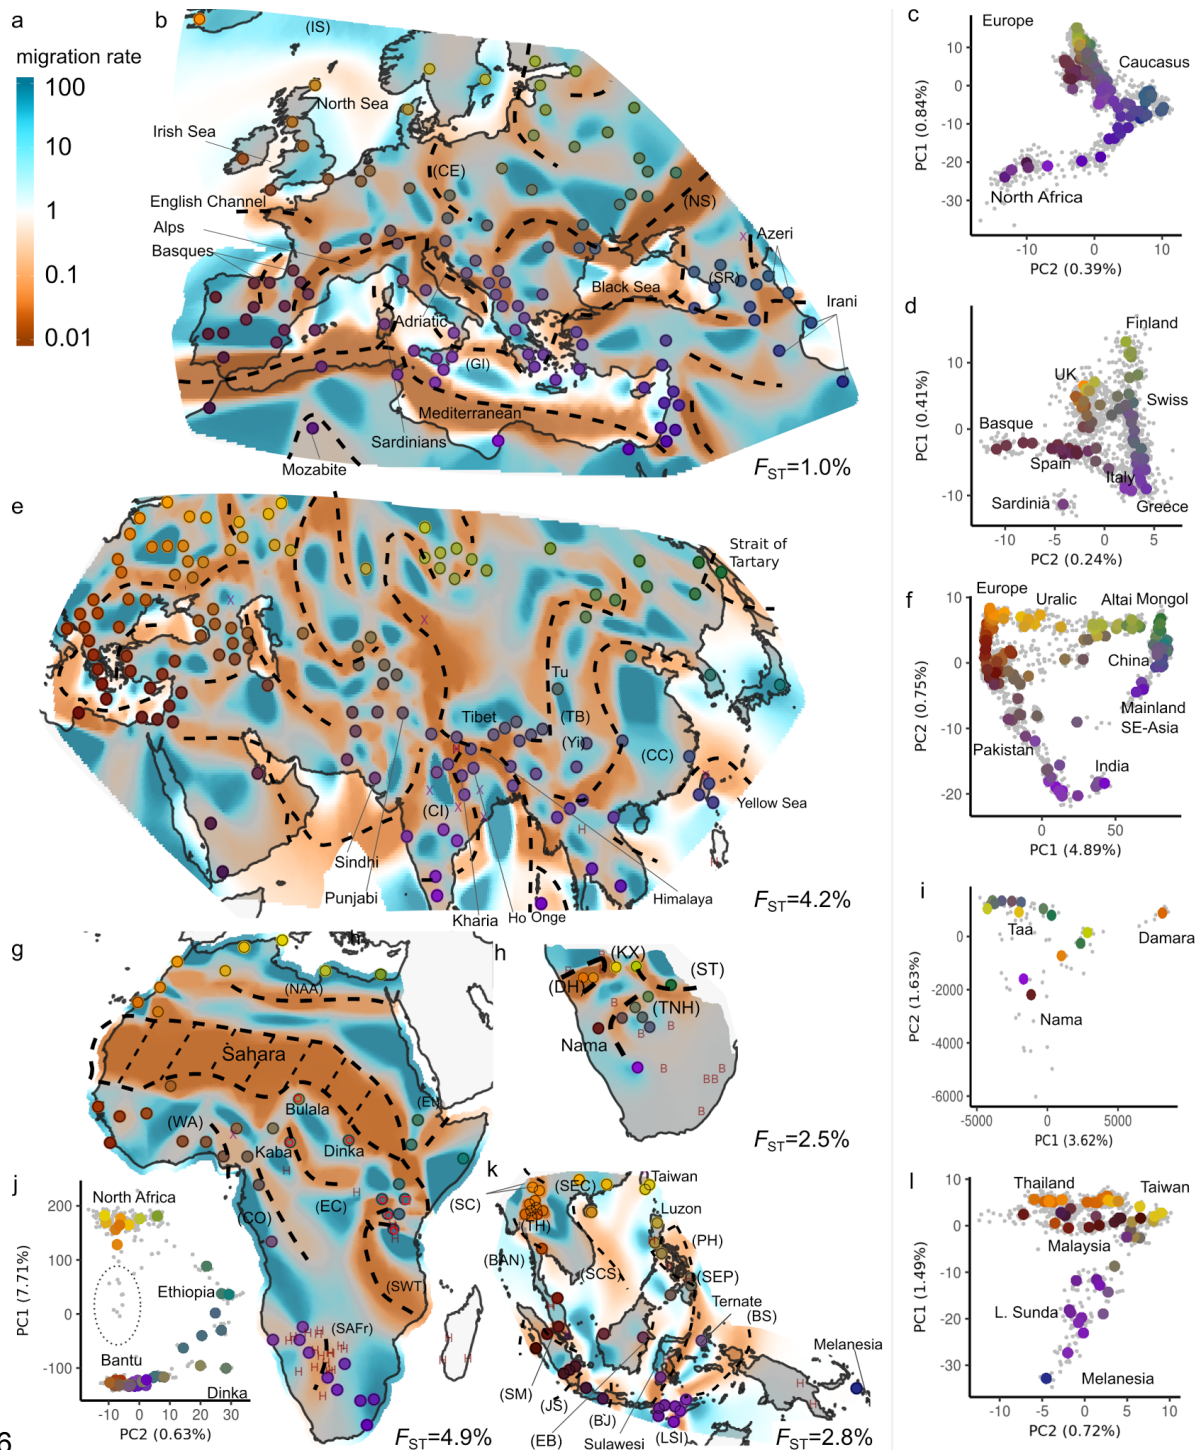

206

**Figure 2: Regional patterns of genetic diversity.** a: scale bar for relative effective migration rate. Posterior effective migration surfaces for b: Western Eurasia (WEA) e: Central/Eastern Eurasia (CEA) g: Africa (AFR) h Southern African hunter-gatherers (SAHG) k: and Southeast Asian (SEA) analysis panels. 'X' marks locations of samples noted as displaced or recently admixed, 'H' denotes Hunter-Gatherer populations (both 'X' and 'H' samples are omitted from the EEMS model fit); in panel g, red circles indicate Nilo-Saharan speakers and in panel h, 'B' denotes Bantu-speaking populations. Approximate location of troughs are shown with dashed lines (see Extended Data Figure 4). PCA plots: c: WEA d: Europeans in WEA f: CEA i: SAHG j: AFR l: SEA. Individuals are displayed as grey dots. Large dots reflect median PC position for a sample; with colors reflecting geography matched to the corresponding EEMS figure. In the EEMS plots, approximate sample locations are annotated. For exact locations, see Extended Data Figure 4 and Table S1. Features discussed in the main text and supplement are labeled.  $F_{ST}$  values per panel emphasize the low absolute levels of differentiation.

217

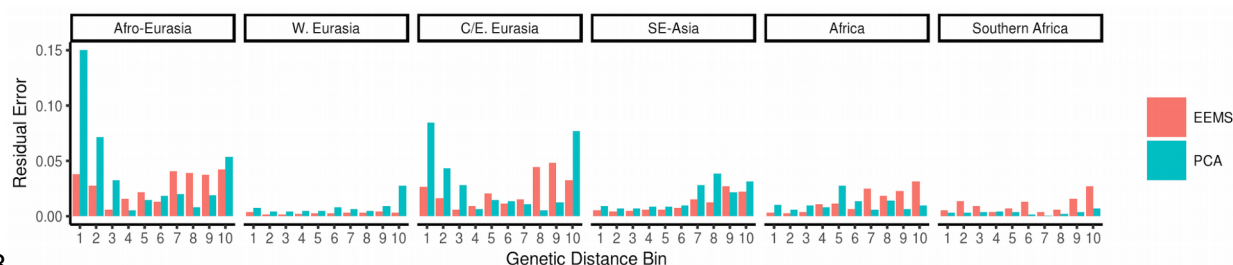

218

219Figure 3: Comparing Fit of PCA and EEMS. We show the relative error of EEMS (red) and PCA (blue, first 10 PCs) for  
220all pairs, stratified by genetic distance. For each panel, all pairwise genetic distances were distributed in ten bins of  
221equal size, for which we then computed the median absolute error of the fitted model vs the observed distances. For  
222W. Eurasia and SE-Asia, EEMS fits uniformly better than PCA. In the Afro-Eurasian, Central/Eastern Eurasian and  
223African panel, EEMS fits better for smaller distances, but the fit is worse for larger distances. For the Southern African  
224Hunter-Gatherers, EEMS fits worse than PCA for all distance bins.

225

## 226Material and Methods

### 227Merging pipeline

228

229We obtained SNP genotype data from 26 different studies (Extended Data Table 1). Processing  
230was done using a reproducible snakemake pipeline<sup>32</sup> available under  
231<http://github.com/NovembreLab/eems-merge>, heavily relying on plink 1.9<sup>33</sup> for handling  
232genotypes. The sources differ in the input format and pre-processing, however in general we  
233performed the following steps:

- 234 1. Remove all non-autosomal, non-SNP variants
  - 235 2. Map SNP to forward strand of human reference genome b37 coordinates using chip  
236 manufacturer metadata files or SNP identifiers
  - 237 3. Remove strand-ambiguous A/T and G/C variants
- 238

239The remaining SNPs were then merged using successive plink --bmerge commands into a  
240single master dataset with 9,003 individuals and 1.9M SNPs but a total genotyping rate of only  
24120.6%. 46 SNPs were removed because different studies reported different alternative alleles.  
242We used a relationship filter of 0.6 using the "--rel-cutoff 0.6" flag in plink to remove 667 closely  
243related individuals or duplicates. After merging, each analysis panel had missingness rates  
244<0.5% (AEA=0.2%, WEA=0.3%, CEA=0.2%, SEA=0.5%, AFR=0.2%, SAHG=0.1%). In all  
245panels, all SNPs passed a one-sided HWE-test ( $p$ -value <  $10^{-5}$ ), with the exception of SEA,  
246where nine (out of 8507 SNPs) failed and were excluded.

### 247Data Retrieval and Filtering

248Human Origins data set<sup>25</sup>

249Sampling location information was obtained from table S9.4 of ref. <sup>25</sup>, and the data were shared  
250by David Reich. We used the population information in the `vdata` subset of all ascertainment



251panels, except for the analysis where we assess ascertainment bias. The utility `convert` from  
252`admixtools`<sup>22</sup> was used to convert the data into plink format.

#### 253Estonian Biocentre data

254The data generated by the Estonian Biocentre<sup>34</sup> were provided in plink format by Mait Metspalu  
255on 10/30/15, along with location information where it was available. This data set contained  
2561,282,568 SNPs. Of those, 6770 SNPs had non-unique ids and were removed.

#### 257HUGO Pan-Asian SNP consortium<sup>35</sup>

258The data were downloaded on 6/24/15 from [www.biotech.or.th/PASNP](http://www.biotech.or.th/PASNP). Location-metadata were  
259obtained on the same day from the map on the same website, and individuals were matched to  
260populations using the individual identifiers. All individuals with the same tag were assigned the  
261median of all locations from that tag. The data were first lifted onto hg19 (with 5 out of 54794  
262SNPs being removed), and then re-formatted into binary plink format. Due to the small size of  
263the chip used and the low overlap with the human origins array in particular, we only consider  
264this data in the South-East Asian panel.

#### 265Uniform global sample<sup>36</sup>

266This data were downloaded on 6/20/15 from [http://jorde-  
267lab.genetics.utah.edu/pub/affy6\\_xing2010/](http://jorde-lab.genetics.utah.edu/pub/affy6_xing2010/). Sampling locations were provided by Jinchuan Xing.  
268We used version 32 of the annotation file obtained on 6/19/15 from [affymetrix.com](http://affymetrix.com) to map SNPs  
269onto hg19, remove strand-ambiguous SNPs and to flip SNPs that were on the minus-strand.

#### 270POPRES data<sup>37</sup>

271POPRES data were obtained under dbGAP study accession phs000145 to John Novembre,  
272and we used the data as processed in ref <sup>16</sup>, and only retain individuals for which all  
273grandparents were from the same country, and labelled the Swiss sample according to self-  
274reported language. We used version 32 of the annotation file obtained on 6/19/15 from  
275[www.affymetrix.com](http://www.affymetrix.com) ("Mapping250K\_sp.na32.annot.csv" and  
276"Mapping250K\_Sty.na32.annot.csv") to filter SNPs that did not map onto hg19 and we removed  
277strand-ambiguous AT and GC polymorphisms.

#### 278African data

279Data from refs <sup>38,39</sup> were obtained on 04/19/17 from David Comas' website under  
280<http://www.biologiaevolutiva.org/dcomas/?p=607>. We used version 32 of the annotation file  
281GenomeWideSNP\_6.na32.annot.csv" obtained on 6/19/15 from [affymetrix.com](http://affymetrix.com) to map SNPs  
282onto hg19, remove strand-ambiguous SNPs and to flip SNPs that were on the minus-strand.

#### 283South-East Asian data<sup>40</sup>

284 The data were obtained on 7/14/15 from Mark Stoneking in three different source files. After  
285merging the three different source files, SNPs not mapping to hg19 using the annotation file

286"GenomeWideSNP\_6.na32.annot.csv" were removed, as were AT and GC SNPs. Sampling  
287locations were extracted from Figure 1 of ref <sup>40</sup>

#### 288Mediterranean Panel<sup>41</sup>

289Data were obtained on 8/13/15 in binary plink format from  
290[http://drineas.org/Maritime\\_Route/RAW\\_DATA/PLINK\\_FILES/MARITIME\\_ROUTE.zip](http://drineas.org/Maritime_Route/RAW_DATA/PLINK_FILES/MARITIME_ROUTE.zip). Sampling  
291location information was obtained from Supplementary Table 3 in ref. <sup>41</sup>. SNPs not mapping to  
292hg19 using the annotation file "GenomeWideSNP\_6.na32.annot.csv" were removed, as were AT  
293and GC SNPs.

#### 294Tibetan and Himalayan data

295Data from refs <sup>42-44</sup> were obtained from Choongwon Jeong and Anna Di Rienzo. We used the  
296same filtering as in the <sup>42</sup> study, but only added the samples originating from these three studies  
297with permission from the respective authors.

#### 298Combining Meta-information

299All sources with the exception of the Estonian Biocentre data provided (approximate) sampling  
300coordinates. However, the level of accuracy varied between sources, with some providing  
301specific ethnicities, some (such as POPRES) only providing country information and others just  
302providing city- or state-level information. For POPRES-derived data, and most countries, we  
303assigned individuals to the country's centerpoint, with the exception of Sweden and Finland,  
304which were assigned their capital. For the Estonian Biocentre data, sampling location data were  
305highly heterogeneous. Samples that could not be confidently assigned to a region with an  
306accuracy of around 100km were excluded. For populations with samples from multiple studies,  
307the most accurate source location was used. For locations covered with different accuracy, only  
308the most accurate samples were retained. For example, we dropped all Spanish individuals  
309from POPRES (only country level data), as the Human Origins data provided higher resolution,  
310with samples from eleven different regions in Spain. The resulting table is given as Table S1.

#### 311Samples omitted from model fitting

312Besides samples whose geographic origin we could not unambiguously assign (n=682), we  
313chose to label on the maps a number of samples that would violate some assumptions of the  
314EEMS model (n=593) without including them in the model fitting. As EEMS assumes an  
315isolation-by-distance model, populations that have recently migrated a long distance have  
316undue influence on the results. As EEMS is also multivariate and analyzes all data sets jointly,  
317these events can have an undesirable disproportionate effect on the estimated surface. As a  
318consequence, we chose to a priori omit known displaced or recent migrant populations (where  
319we define recent as approx. the last 500 years). Similarly, we omit populations that are known a  
320*priori* to be admixed between source groups that are clearly distinct. The resulting populations  
321are denoted as "ADMIX" in Table S1. These include the Han-Chinese in Singapore and Han-  
322Chinese in Taiwan, who both are recent migrant populations to those locales, as well as the  
323Uygurs, who are admixed between East Asian and Europeans. In India, we omitted the Bhunjia,  
324Dhurwa and Gond samples, who were denoted as admixed by the primary publication<sup>45</sup>.

325Furthermore, we omitted the Kusundas, who have both Indian and Tibetan ancestry, and the  
326Kalmyks, who moved from present-day China to the Caspian Sea in the 17th century. Finally,  
327we omitted the Yakut, who have both Turkic and East Asian ancestry, and all Jewish samples,  
328due to complexity of the diaspora and subsequent local admixture<sup>46</sup>.

329

330In addition, we label but omit from model fitting most hunter-gatherer populations because they  
331frequently live in and around other human groups with limited interaction, giving thus two layers  
332of structure that EEMS does not model. (Extended Data Figure 6c). An exception was made for  
333Onge, since they are geographically isolated from other subsistence populations, and have  
334been interpreted as fundamental to understand Indian population structure.<sup>19</sup> In addition,  
335hunter-gatherers make up a very small proportion of modern human genetic diversity, but are  
336well-studied genetically, and combining the samples would include a bias that would be difficult  
337to control. We do, however, analyze the South-African hunter gatherer samples, as we have  
338very dense samples from a single region, but do not include them in our Afro-Eurasian and  
339African panels. Other African samples we omit are the Mbuti and Biaka, the Hazara and  
340Sandawe and all Malagasy samples. We also omitted several high latitude samples, as most of  
341these samples contain groups that have largely hunter-gatherer ancestries, were nomadic or  
342were recently displaced and thus are difficult to place in an explicit geographic setting. This  
343included the Saami in Europe as well as the Arctic Karelian, Nenets, Nganasans, Chukchi,  
344Dolgan and Aleuts. In South-East Asia, we omit all Negrito samples as well as the Aeta and Ati  
345on the Phillipines.

346

347Finally, to avoid any possible distortion due to uneven sampling, we downsampled all single  
348locales to at most 50 individuals, drawn independently for different panels. This resulted in a  
349total of 5372 individuals used in at least one panel (Supplementary Data Table 1).

## 350Visualization pipeline

351We developed a second pipeline using snakemake<sup>32</sup> to perform all subsetting and demographic  
352analyses, available under [github.com/NovembreLab/eems-around-the-world](https://github.com/NovembreLab/eems-around-the-world). The pipeline  
353allows for defining panels using a flexible set of features, latitudinal and longitudinal boundaries,  
354continent or country of samples, source study, as well as the addition and exclusion of particular  
355samples or populations. Based on these subsets, different modules allow performing EEMS and  
356PCA analyses, as well as generating all the figures, that were then annotated using inkscape. All  
357configuration variables are stored in json and yaml config files. We perform EEMS and PCA for  
358each panel independently. Structural variants are a potential confounding factor for genome-  
359wide SNP based analysis. In PCA, these variants may result in a number of neighboring SNP in  
360high LD to have very high loadings, thus overemphasizing the effect of these variants. For this  
361reason, it is advisable to remove regions containing SNP that have extremely high loadings on  
362some Principal component. Thus, for each panel, we perform a preliminary PCA analysis using  
363flashpca<sup>47</sup>. The loading-scores for each PC were normalized by dividing them by the standard  
364deviations on each PC [ $\text{outlier\_score} = L[i]/\text{sd}(L[i])$ ], and then we removed a 200kb window  
365around any SNP for which  $|\text{outlier\_score}| > 5$ . We also dropped individuals with more than 5%  
366missingness, and SNPs with more than 1% missing data from each panel.

## 367EEMS

368To generate the map surfaces, we must choose a grid size and boundaries. Choosing a coarse  
369grid results in faster computation, but only produces a map with broad-scale patterns. A finer  
370grid, on the other hand, is able to reveal more details, but at a steep increase in computational  
371cost and with an increased danger of introducing patterns that are harder to interpret. Grid  
372density and sizes are given in Extended Data Table 1, along with a population level  $F_{ST}$   
373calculated using plink.

374

375We evaluated the impact of SNP ascertainment bias by running EEMS on the multiple,  
376documented SNP ascertainment panels of the Human Origins data<sup>25</sup>. We found that while  
377ascertainment bias has an effect on the heterozygosity surfaces that EEMS estimates, the  
378migration surfaces remain relatively unaffected (Extended Data Fig. 1). Therefore, we restrict  
379our presentation to the migration surfaces.

380

381For each panel, we performed six pilot runs of 6 million iterations each. The run with the highest  
382likelihood was then used for a second set of four runs of 4 million iterations each, with the first 1  
383million discarded as burn-in. Every 10,000th iteration was sampled. EEMS approximates a  
384continuous region with a triangular grid, which has to be specified. We generated global  
385geodesic graphs at three resolutions (approximate distance between demes of 100, 200 and  
386500km, respectively) using dggrid v6.1<sup>48</sup> and intersected these graphs with the area  
387representing each panel (Extended Figures 2,3). All other (hyper-)parameters were kept at their  
388default values<sup>49</sup>.

389

390We compared EEMS to an isolation-by-distance model with a constant migration rate by re-  
391fitting EEMS allowing only a single migration rate tile, but arbitrary diversity rate tiles using the  
392otherwise same settings. The resulting log Bayes Factors are given in Extended Table 2.

393

## 394Evaluating fit of EEMS and PCA to genetic distances

395For EEMS, the posterior samples imply an expected distance matrix between populations. For  
396PCA, the components and their loadings provide an approximation to the genetic distance  
397matrix between individuals. We use the median PCA values of individuals across ten PC  
398components to produce an expected genetic distance matrix between populations. We use ten  
399PC components as most investigators evaluate population structure based on only the first  
400several PCs. For each method the expected genetic distance matrices are compared to the  
401observed matrices using a simple linear correlation computed between all pairwise distances.

402

## 403Acknowledgements

404We are grateful for helpful comments from Choongwon Jeong, Matthew Stephens, Anna Di  
405Rienzo, Melinda A. Yang, Joshua G. Schraiber and members of the Novembre lab. This  
406research was supported by research grants NIH/NCI U01 CA198933 and NIH/NIGMS R01

407GM108805 (J. N. and B. M. P) and by a Swiss National Science Foundation early postdoc  
408mobility fellowship (B. M. P.). We dedicate the paper in memoriam of Brad McRae (1966-2017)  
409whose work on resistance distances underlies the EEMS methodology.

410

411Author contributions.

412B.M.P. analyzed data. B.M.P., D.P., and J.N. interpreted results. B.M.P and J.N conceived the  
413study and wrote the manuscript.

## 414Competing financial interests

415The authors declare no competing financial interests.

## 416Correspondence to:

417Benjamin Peter ([benj.pet@gmail.com](mailto:benj.pet@gmail.com)), or John Novembre ([jnovembre@uchicago.edu](mailto:jnovembre@uchicago.edu))

## 418Data Availability

419The source and availability of all data is outlined in the methods (“Data Retrieval and Filtering”  
420subsection).

## 421Supplementary Text on Regional Scale Analyses

422Here we provide a more expanded discussion of the regional-scale results. To help identify  
423features that we discuss, we have added labels to discussed features in the figures, and refer to  
424them in the text here in parentheses. The labels are typically capitalized abbreviations and in  
425some cases are full words.

426

427**Europe.** Europe appears largely homogeneous in the Afro-Eurasia panel, but a finer-scale  
428analysis (Western Eurasia panel, Fig. 2a;  $n=2,018$ ; 119 locales,  $F_{ST}=0.010$ ) reveals abundant  
429fine-scale structure: bodies of waters are consistently covered by lower effective migration  
430regions, with migration being lower in southern seas (Mediterranean, Adriatic, Black Sea)  
431relative to those in northern Europe (North Sea, Irish Sea, English Channel). Terrestrial barriers  
432are observed in: The Alps (and an adjacent region extending into Southern France), surrounding  
433the Mozabites in Tunisia, the western and northern edges of the Arabian desert (though we note  
434the region has few samples). Troughs reflecting historical domains are observed: between  
435Germanic and Northern Slavic-speakers (CE), between domains of Slavic-speakers and the  
436Caucasus (NS), and in the Caucasus in a region with Irani, Azeri, and Adygei in Southern  
437Russia (SR). Remaining regions are generally inferred to have above average migration, with  
438one obvious corridor being that between Iceland and Scandinavia, presumably due to the recent  
439colonization of Iceland. One interesting feature is an area of East-West low migration between  
440the Italian peninsula and Greece (GI). A corridor between Crete and Sicily is inferred south of it,  
441and between mainland Greece and southern Italy north of it. This likely reflects a pattern of  
442close genetic similarity among coastal Mediterranean populations observed previously<sup>41</sup> but  
443suggests it may have north-south structure. Ancient DNA results suggest that the patterns we  
444observe are recent<sup>50,51</sup> and have been shaped in the last 3,000-5,000 years with contributions

445from multiple sources. Strikingly, proposed expansion routes through the Eurasian Steppe and  
446Levant into Europe partially align with corridors of high effective migration.

447

448**Central/Eastern Eurasia.** The Central/Eastern Eurasia surface (Fig. 2e;  $n=2,411$ ; 163 locales,  
449 $F_{ST}=0.042$ ) is overall similar to the patterns seen in the AEA panel, with a trough through the  
450Himalayas/Tien-Shan and two corridors connecting Europe with Central Asia around the  
451Caspian Sea. Particularly in India and East Asia the higher resolution EEMS analysis reveals  
452additional details: Where the global analysis did not reveal any strong patterns in South Asia, at  
453the higher resolution we observe troughs in the Indian subcontinent between central India (CI)  
454and populations to the north (Sindhi, Punjabi), two Austroasiatic speaking populations to the  
455east (Kharia, Ho), and Southern India, where Dravidian languages are most common.

456

457In East Asia, we observe marine troughs in the East China Sea, strait of Tartary and the  
458Andaman Sea (Onge). Terrestrially, we observe troughs between coastal China (CC), a central  
459region with several Tibeto-Burman samples (TB, along with the Tu who speak a Mongolic  
460language, and have been suggested to have received European admixture 1,200y ago<sup>24</sup>), and a  
461western region anchored by Tibetan samples. The coastal Chinese region extends in a corridor  
462into Korea and Japan.

463

464Overall, the Central/East Asia panel is particularly complex with one of the lowest levels of  $r^2$   
465between EEMS expected genetic distances and the observed distances ( $r^2 = 0.66$ , Extended  
466Data Fig. 5). This is expected as the relatively open steppe has been the site of repeated long-  
467range population movements and invasions, by e.g. Bronze Age Steppe populations, Mongols  
468and Turkic speakers, that we expect are difficult to depict using the model of steady-state gene  
469flow model fit by EEMS.

470

471**South-East Asia.** In the South-East Asian panel ( $n=940$ , 53 locales;  $F_{ST}=0.028$ ; Fig. 2k)  
472troughs align with the many seas and channels in this region: the South-Chinese Sea (SCS),  
473the waterway running east of the Philippines (PH) and Sulawesi south to the Flores Sea (SEP),  
474the waterway between western New Guinea into the Banda Sea (BS), the Malacca strait  
475between Sumatra and Malaysia (SM), the Sunda Strait between Java and Sumatra (JS), the  
476Java Sea between Bali and Java (BJ), as well as the Makassar strait and Celebes Sea between  
477Borneo and Sulawesi (EB). Two corridors, one from Taiwan/Luzon through Western Mindanao  
478to Sulawesi, and one from Ternate through the Lower Sunda Islands (LSI) into Melanesia  
479possibly reflect the Austronesian expansion that started roughly 3,000 years ago<sup>52</sup>. On the  
480mainland, we find low effective migration north of Bangkok (BAN) and near samples from  
481Northern Thailand (TH) (including the Southern Chinese Wa and Jinuo samples (SC)). These  
482two samples have low inferred effective migration with South-Eastern Chinese samples (SEC).

483

484**Africa.** In Africa, we analyze non-hunter-gatherers (AFR,  $n=521$ , 47 locales,  $F_{ST}=0.049$ ; Fig. 2g)  
485and South-African hunter-gatherers (SAHG,  $n=109$ , 16 locales,  $F_{ST}=0.025$ ; Fig 2h)  
486independently, as traditional hunter-gatherers and farmers are typically differentiated and it is  
487difficult for EEMS to model large genetic dissimilarities at close geographic proximity (Extended  
488Data Fig. 6a)<sup>53,54</sup>. In the AFR-panel, language group boundaries align with several troughs: a

489large one extends through the Sahara into Eastern Africa, roughly along the boundary of Niger-  
490Congo and Afro-Asiatic language speakers<sup>55</sup>. In sub-Saharan Africa, west Africa appears as a  
491high-gene-flow region (WA), and two corridors pass from Nigeria - one along the coast of Congo  
492(CO) southwards and another further east (EC) connecting to Kenya and Tanzania. The South  
493African samples (all Bantu speakers) are split into Eastern and Western Bantu groups by a  
494single trough. In both Central and Eastern Africa Nilo-Saharan and Niger-Congolese speakers  
495overlap, resulting in low effective migration imperfectly correlated with language groups: The  
496Nilo-Saharan Dinka and Bulala are in a region of high gene flow, to the exclusion of the Kaba.  
497Southern and Eastern Africans are separated by low effective migration through Mozambique  
498and South-Western Tanzania (SWT).

499

500In Northern Africa (NAA), we see a trough of low effective migration separating two latitudinal  
501corridors; one following the Mediterranean coast and one inland (Fig 2g). The inland corridor  
502disappears in our lower-resolution Afro-Eurasia panel (Figure 1a) and when we drop individuals  
503from Western Sahara that appear intermediate between North Africa coastal populations and  
504East African populations (Extended Data Fig. 6d). We suspect this corridor emerges as EEMS  
505attempts to model ancestry in Western Sahara populations that is distinct from that found in  
506coastal North Africa.

507

508For the South African Hunter-Gatherers (Fig. 2h) most samples fall into a central region with  
509high effective migration, including the Taa, Naro and Hoan (TNH). Troughs in the North separate  
510this region from the Sua and Tswa (ST) and in the south-west from the Khomani and Nama  
511(Nama), respectively. The remaining samples fall either into a Northern high migration area  
512(Khwe and Xuun, KX) or a North-Western low migration area (Damara and Haiom, DH). These  
513results are broadly consistent with existing work on African population structure<sup>56-59</sup>, and  
514emphasize African population structure appears largely determined by the Sahara desert, the  
515Bantu and Arabic expansions, and the complex structure of hunter-gatherer groups specifically  
516in South Africa.

517

## 518 Extended Data

| Authors                            | Abbrev | Ind. | Loc. | Reference |
|------------------------------------|--------|------|------|-----------|
| Bryc et al. 2009                   | B09    | 109  | 10   | Ref. 38   |
| Behar et al. 2010                  | Be10   | 295  | 22   | Ref. 60   |
| Behar et al. 2013                  | B13    | 130  | 20   | Ref. 61   |
| Bigham et al. 2010                 | Bi10   | 45   | 3    | Ref. 43   |
| Cardona et al. 2014                | C14    | 120  | 16   | Ref. 62   |
| Chaubey et al. 2011                | C11    | 26   | 3    | Ref. 45   |
| Di Cristofaro et al. 2013          | D13    | 5    | 1    | Ref. 63   |
| Fedorova et al. 2013               | F13    | 24   | 3    | Ref. 64   |
| HUGO Pan-Asian SNP Consortium 2009 | H09    | 870  | 42   | Ref. 35   |
| Hunter-Zinck et al. 2010           | H10    | 86   | 1    | Ref. 39   |
| Jeong et al. 2017                  | J17    | 53   | 2    | Ref. 42   |
| Kovacevic et al. 2014              | K14    | 70   | 6    | Ref. 65   |
| Lazaridis et al. 2014              | L14    | 1409 | 142  | Ref. 66   |
| Metspalu et al. 2011               | M11    | 120  | 7    | Ref. 67   |
| Migliano et al. 2013               | M13    | 49   | 3    | Ref. 68   |
| Paschou et al. 2014                | Pa14   | 621  | 29   | Ref. 41   |
| Pierron et al. 2014                | Pi14   | 16   | 1    | Ref. 69   |
| Nelson et al. 2008                 | N08    | 542  | 29   | Ref. 37   |
| Raghavan et al. 2014               | R14    | 75   | 7    | Ref. 70   |
| Rasmussen et al. 2011              | Ra11   | 3    | 1    | Ref. 71   |
| Rasmussen et al. 2010              | R10    | 44   | 3    | Ref. 72   |
| Reich et al. 2011                  | Re11   | 96   | 15   | Ref. 73   |
| Xing et al. 2010                   | X10    | 92   | 4    | Ref. 36   |
| Xu et al. 2011                     | X11    | 28   | 3    | Ref. 44   |
| Yunusbayev et al. 2012             | Y12    | 183  | 14   | Ref. 74   |
| Yunusbayev et al. 2015             | Y15    | 247  | 36   | Ref. 34   |

519

520 **Extended Data Table 1:** Data Sources. Abbrev: Abbreviation; Ind: total number of individuals; Loc. Number of unique  
521 sample locations

522

| Panel                   | Abb. | Individuals | Locations | SNPs  | Grid Size (# of demes) | Resolution (km) | $F_{ST}$ | Support (log-BF) |
|-------------------------|------|-------------|-----------|-------|------------------------|-----------------|----------|------------------|
| Afro-Eurasia            | AEA  | 4006        | 291       | 20167 | 620                    | 500             | 0.0605   | 232,047          |
| Western Eurasia         | WEA  | 2018        | 119       | 26358 | 1320                   | 100             | 0.0097   | 41,371           |
| Central/Eastern Eurasia | CEA  | 2411        | 163       | 21060 | 1078                   | 200             | 0.0417   | 111,794          |
| South-East Asia         | SEA  | 939         | 52        | 8498  | 1388                   | 100             | 0.0284   | 9,378            |



|                 |      |     |    |        |     |     |        |       |
|-----------------|------|-----|----|--------|-----|-----|--------|-------|
| Africa          | AFR  | 521 | 47 | 19493  | 647 | 200 | 0.0490 | 4,881 |
| Southern Africa | SAHG | 109 | 16 | 532343 | 227 | 100 | 0.0249 | 1,448 |

523 **Extended Data Table 2:** Analysis Panels. Abb. Panel Abbreviation. Res. Avg. distance between  
524 grid points (in km) ; Support: log Bayes factor in favor of complex vs constant migration model.

525

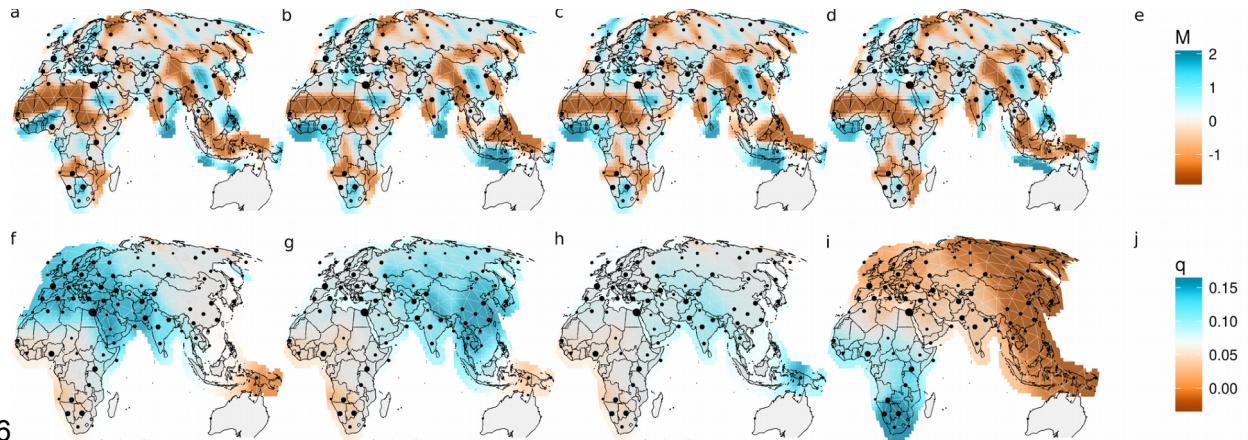

526

527

528 **Extended Data Figure 1:** Ascertainment bias. We run EEMS only using the Human Origin data  
529<sup>25</sup>, using SNPs ascertained in a French (a/f), Chinese (b/g), Papuan (c/h) and San(d/i) individual.

530 Migration rate surfaces (a-d) remain robust, whereas the within-deme diversity surfaces (f-i)

531 show highest diversity at the respective ascertainment location. e/j: scale bars for migration

532 rates and within-deme diversity rate parameters, respectively.

533

534

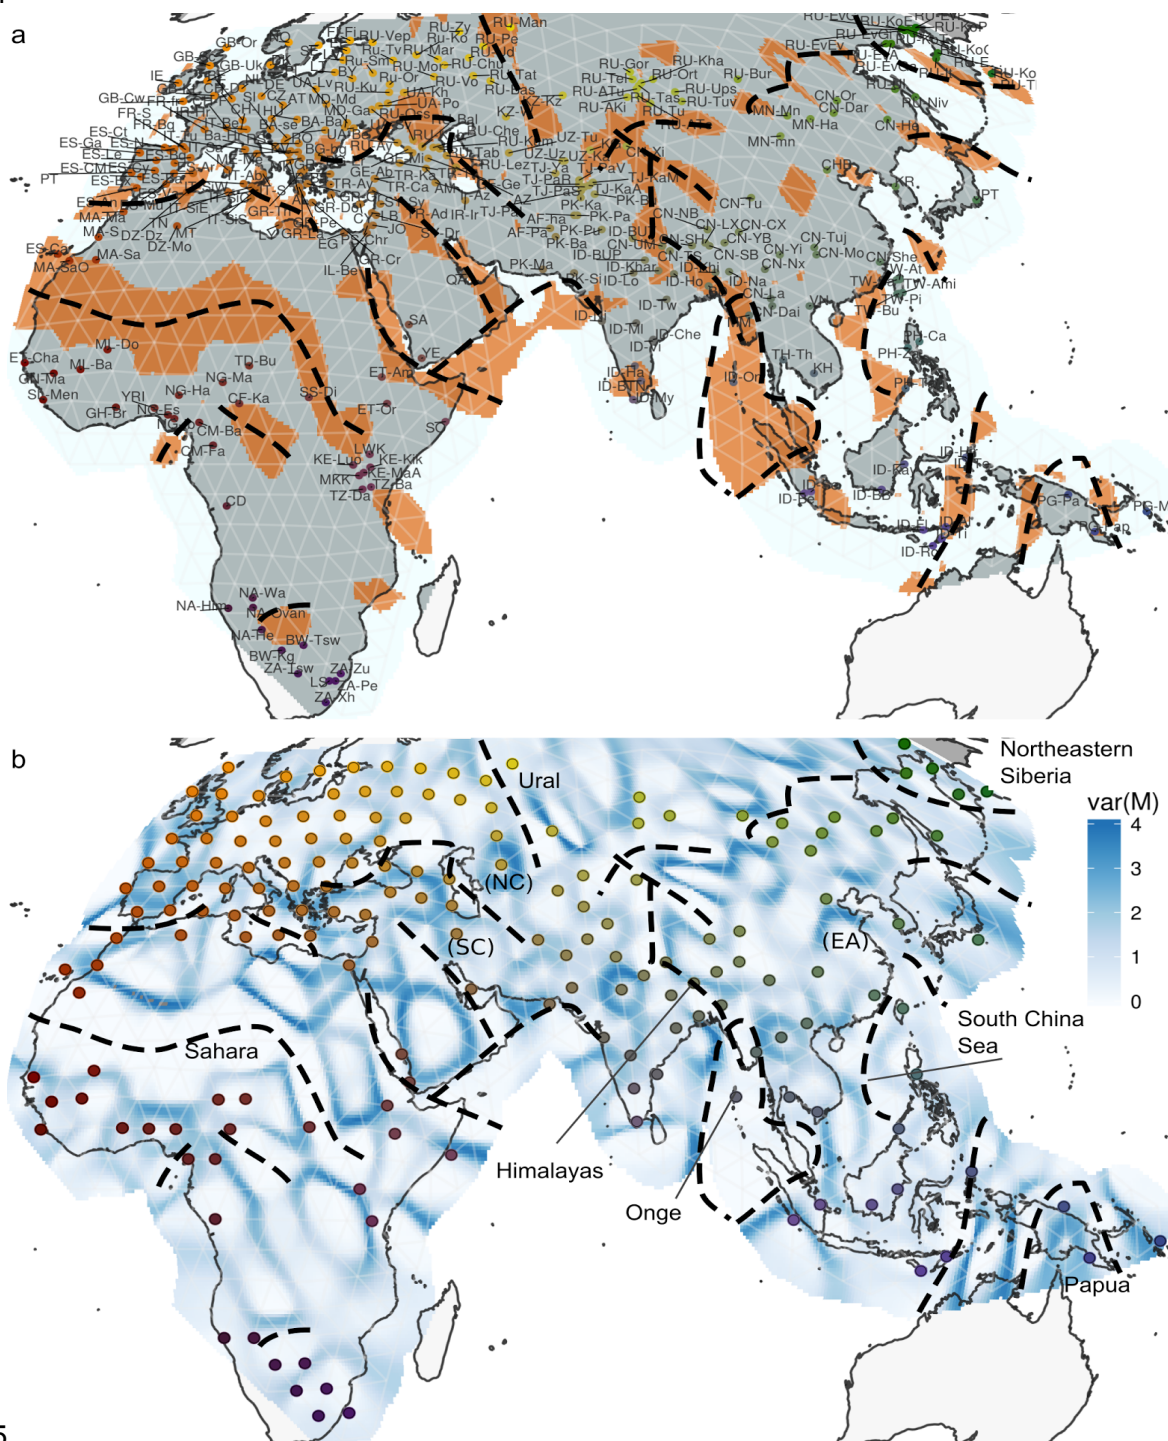

535

536 **Extended Data Figure 2:** a: Location of troughs (below average migration rate in more than 95% of  
537 MCMC iterations) are given in brown. Sample locations and EEMS grid are displayed. b: Posterior  
538 variance on migration rate parameters. Note that most significant features are in low variance regions, but  
539 that they are often surrounded by high-variance regions, implying the exact boundary of troughs is  
540 estimated with uncertainty. Grid-fitted sample locations are displayed. Annotation in both panels is  
541 identical to Figure 1a.

542

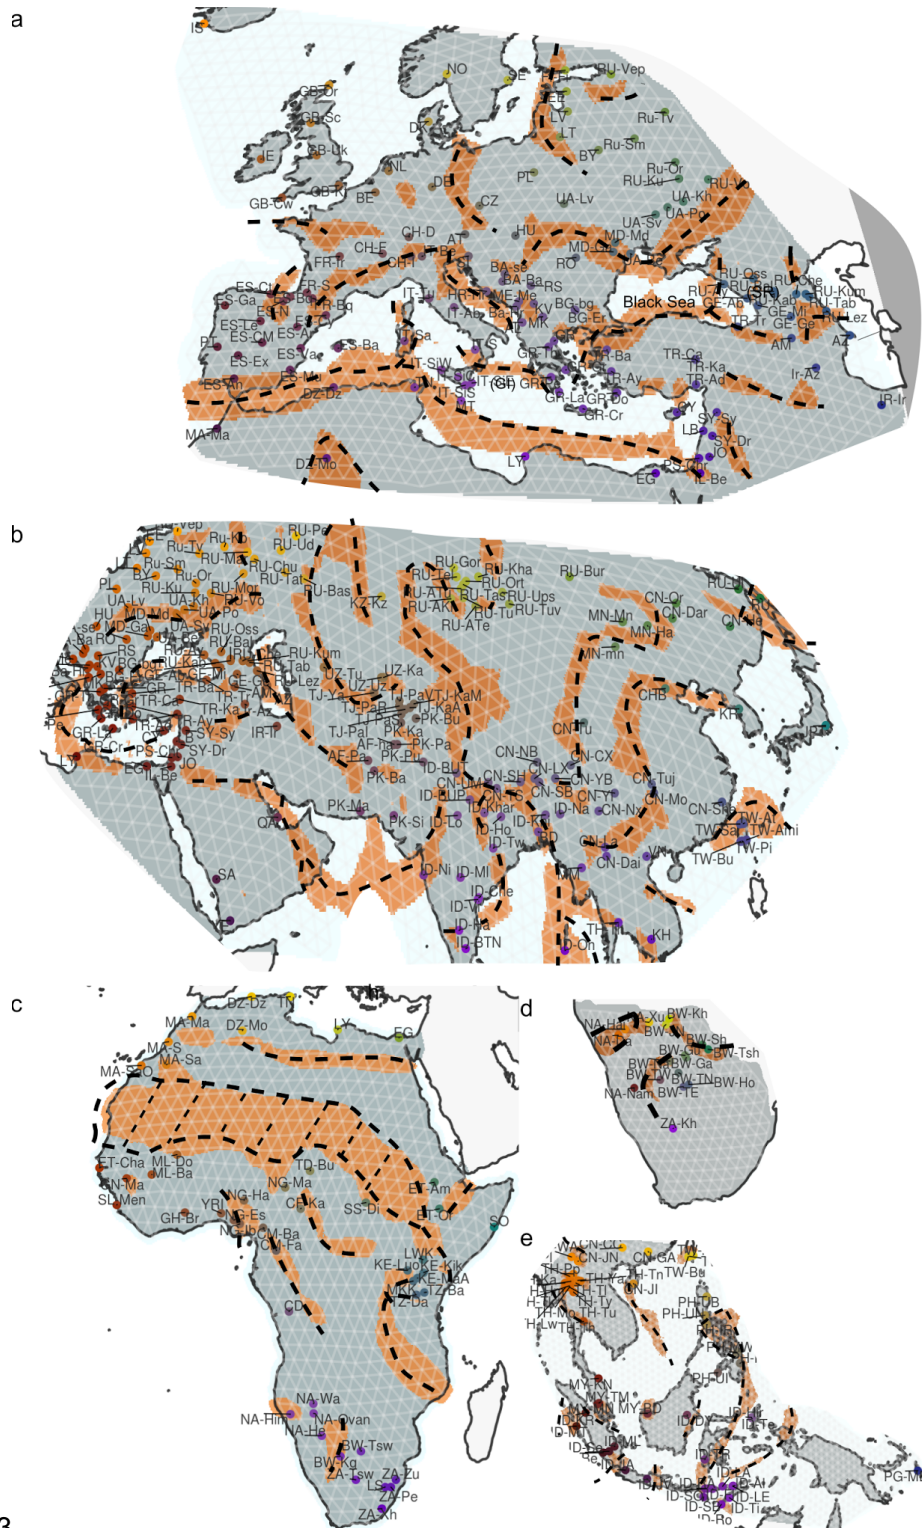

543

544 **Extended Data Figure 3:** Location of troughs (below average migration rate in more than 95%  
 545 of MCMC iterations) are given in brown. Sample locations and EEMS grid are displayed for a:  
 546 WEA b: CEA c: AFR d: SAHG and e: SEA analysis panels. Annotation in all panels is identical  
 547 to Figure 2.  $F_{ST}$  values are provided per panel to emphasize the low absolute levels of  
 548 differentiation.

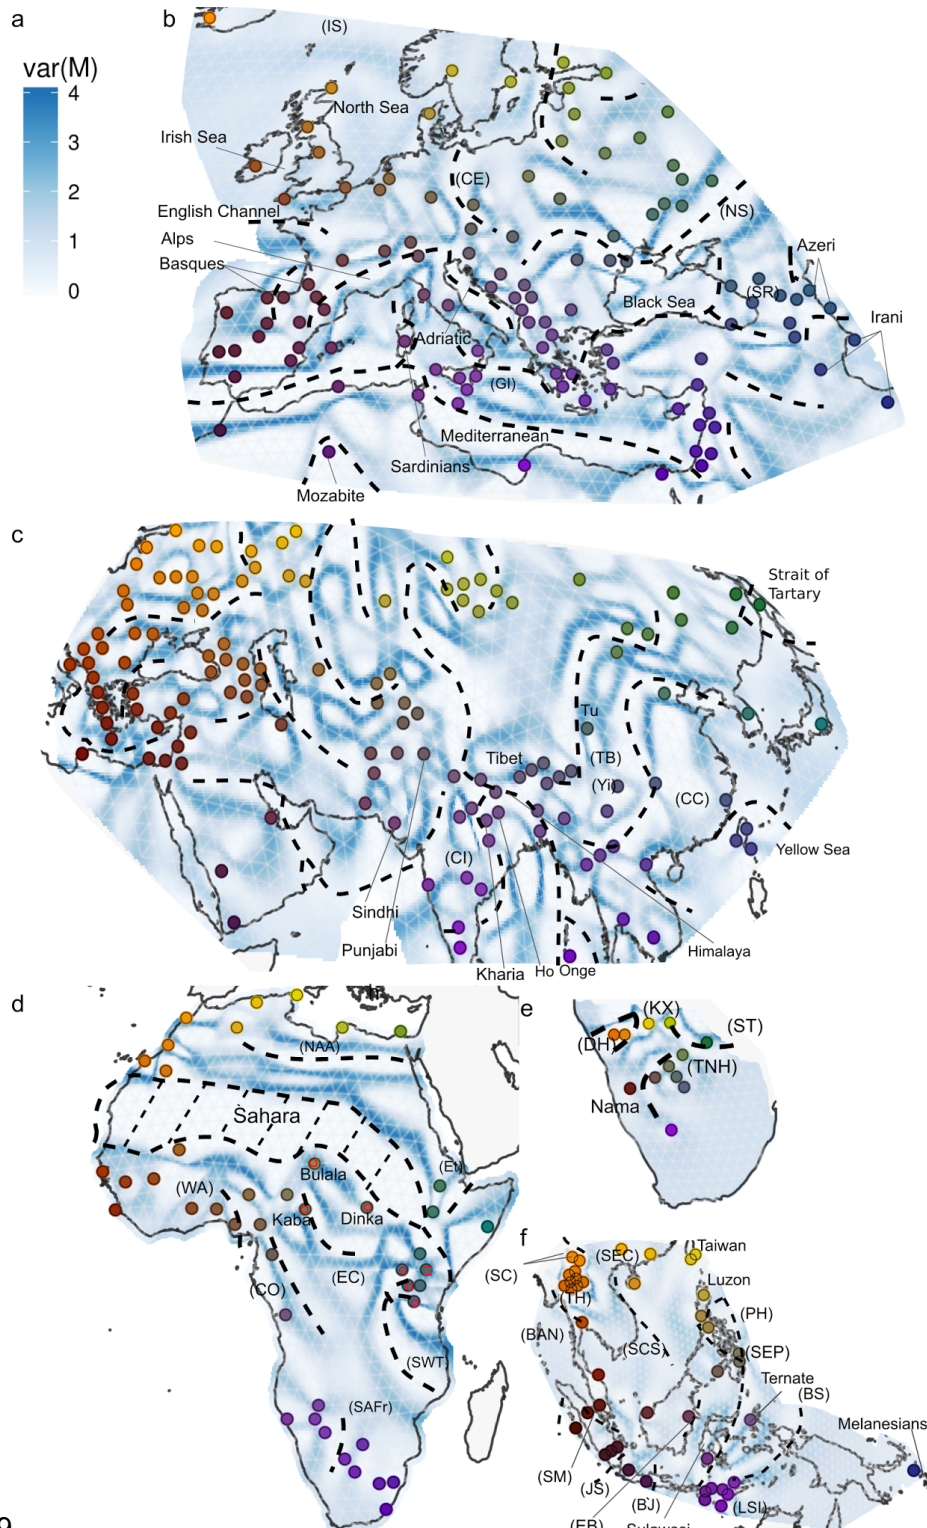

549

550 **Extended Data Figure 4:** Posterior variances in migration rate parameters. Grid-fitted sample  
 551 locations are displayed. **a:** scale bar **b:** WEA **c:** CEA **d:** AFR **e:** SAHG and **f:** SEA analysis  
 552 panels. Note that most significant features are in low variance regions, but that they are often  
 553 surrounded by high-variance regions, implying the exact boundary of troughs is estimated with  
 554 uncertainty. Annotation of troughs and select features is identical to Figure 2.

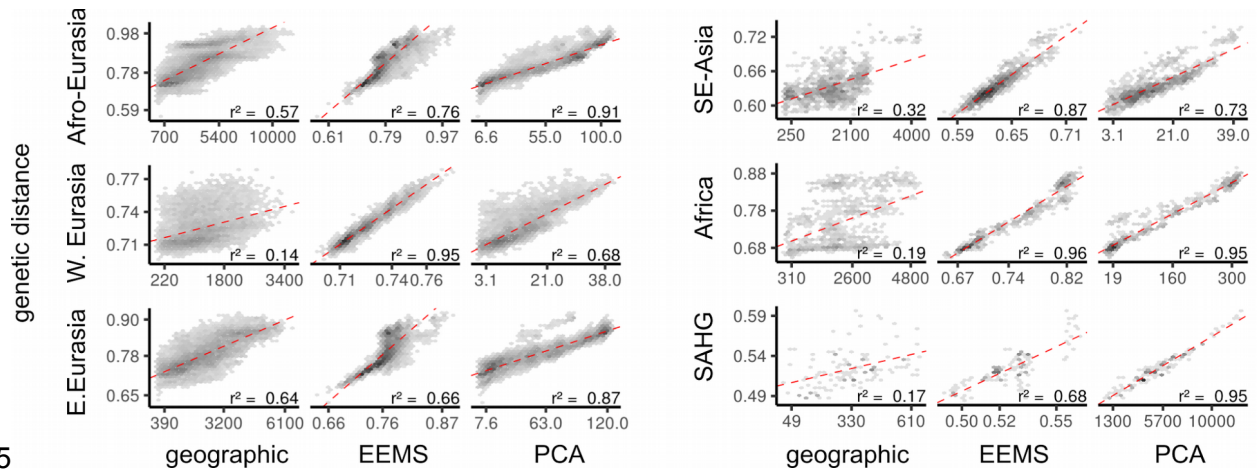

555

556 **Extended Data Figure 5:** Hex-binned scatterplots of genetic distance versus geographic  
557 distance (in km), predicted distance via EEMS model fit, and predicted distance via a ten-  
558 component PCA, for all panels. Darker areas correspond to bins with more points. The fit of a  
559 simple linear regression (red dashed lines) and  $r^2$  are given.

560

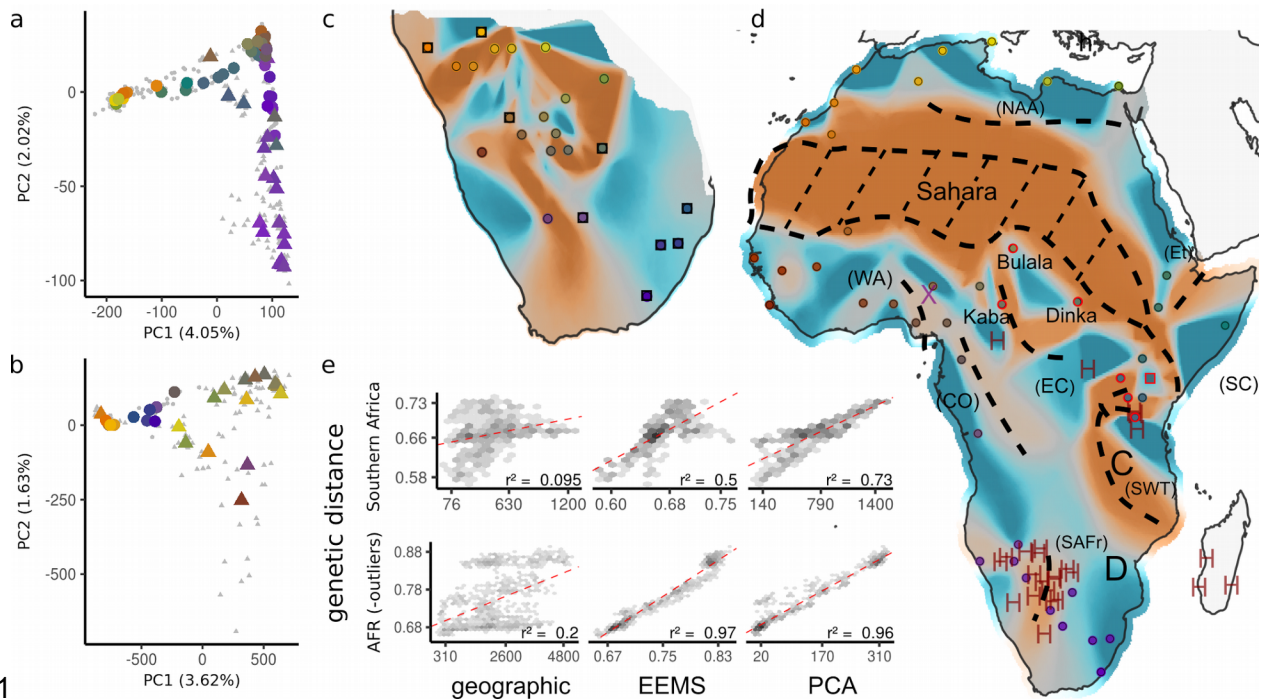

561

562

563 **Extended Data Figure 6:** Results for Africa panels with all samples analyzed. **a:** PCA of all African samples **b:** PCA of all Southern  
564 African samples. In both samples, individuals annotated as hunter-gatherers are displayed as triangles. Colored dots reflect median  
565 of sample locations; with colors reflecting geography and matching in the corresponding EEMS posterior. Approximate sample  
566 locations are annotated. For exact locations, see annotated Extended Data Figure 4 and Table S1. **c:** EEMS posterior mean surface  
567 of all Southern African samples. Agriculturalist samples are marked with squares. The interspersed geography of Hunter-Gatherers  
568 and agriculturalists results in a poor fit with several very sharp boundaries. **d:** EEMS posterior mean of AFR samples with outlier  
569 individuals (circled in Figure 2) removed. The horizontal barrier (NAA) observed in Fig 2g disappeared. **e:** Hex-binned scatterplots  
570 of genetic distance versus geographic distance (in km), predicted distance via EEMS model fit, and predicted distance via a ten-  
571 component PCA, for the data corresponding to the EEMS maps presented in this figure. Darker areas correspond to bins with more  
572 points. The fit of a simple linear regression (red dashed lines) and  $r^2$  are given. In Southern Africa, geography and EEMS only  
573 weakly predict genetic diversity.

## 574 Additional References

- 575 32. [Köster, J. & Rahmann, S. Snakemake--a scalable bioinformatics workflow engine. \*Bioinformatics\* \*\*28\*\*, 2520–2522 \(2012\).](#)
- 576 33. [Chang, C. C. \*et al.\* Second-generation PLINK: rising to the challenge of larger and richer datasets. \*Gigascience\* \*\*4\*\*, 7](#)
- 577 [\(2015\).](#)
- 578 34. [Yunusbayev, B. \*et al.\* The Genetic Legacy of the Expansion of Turkic-Speaking Nomads across Eurasia. \*PLoS Genet.\* \*\*11\*\*,](#)
- 579 [e1005068 \(2015\).](#)
- 580 35. [HUGO Pan-Asian SNP Consortium. Mapping human genetic diversity in Asia. \*Science\* \*\*326\*\*, 1541–1545 \(2009\).](#)
- 581 36. [Xing, J. \*et al.\* Toward a more uniform sampling of human genetic diversity: a survey of worldwide populations by high-](#)
- 582 [density genotyping. \*Genomics\* \*\*96\*\*, 199–210 \(2010\).](#)
- 583 37. [Nelson, M. R. \*et al.\* The Population Reference Sample, POPRES: a resource for population, disease, and](#)
- 584 [pharmacological genetics research. \*Am. J. Hum. Genet.\* \*\*83\*\*, 347–358 \(2008\).](#)
- 585 38. [Bryc, K. \*et al.\* Genome-Wide Patterns of Population Structure and Admixture in West Africans and African Americans.](#)
- 586 [\*Proc. Natl. Acad. Sci. U. S. A.\* \(2009\). doi:10.1073/pnas.0909559107](#)
- 587 39. [Hunter-Zinck, H. \*et al.\* Population genetic structure of the people of Qatar. \*Am. J. Hum. Genet.\* \*\*87\*\*, 17–25 \(2010\).](#)
- 588 40. [Reich, D. \*et al.\* Denisova admixture and the first modern human dispersals into Southeast Asia and Oceania. \*Am. J. Hum.\*](#)
- 589 [\*Genet.\* \(2011\).](#)
- 590 41. [Paschou, P. \*et al.\* Maritime route of colonization of Europe. \*Proc. Natl. Acad. Sci. U. S. A.\* \*\*111\*\*, 9211–9216 \(2014\).](#)
- 591 42. [Jeong, C. \*et al.\* A longitudinal cline characterizes the genetic structure of human populations in the Tibetan plateau. \*PLoS\*](#)
- 592 [\*One\* \*\*12\*\*, e0175885 \(2017\).](#)
- 593 43. [Bigham, A. \*et al.\* Identifying Signatures of Natural Selection in Tibetan and Andean Populations Using Dense Genome](#)
- 594 [Scan Data. \*PLoS Genet.\* \*\*6\*\*, e1001116 \(2010\).](#)
- 595 44. [Xu, S. \*et al.\* A genome-wide search for signals of high-altitude adaptation in Tibetans. \*Mol. Biol. Evol.\* \*\*28\*\*, 1003–1011](#)
- 596 [\(2011\).](#)
- 597 45. [Chaubey, G. \*et al.\* Population Genetic Structure in Indian Austroasiatic Speakers: The Role of Landscape Barriers and](#)
- 598 [Sex-Specific Admixture. \*Mol. Biol. Evol.\* \*\*28\*\*, 1013–1024 \(2011\).](#)
- 599 46. [Behar, D. M. \*et al.\* The genome-wide structure of the Jewish people. \*Nature\* \*\*466\*\*, 238–242 \(2010\).](#)
- 600 47. [Abraham, G. & Inouye, M. Fast principal component analysis of large-scale genome-wide data. \*PLoS One\* \*\*9\*\*, e93766](#)
- 601 [\(2014\).](#)
- 602 48. [Sahr, K., White, D. & Kimerling, A. J. Geodesic Discrete Global Grid Systems. \*Cartogr. Geogr. Inf. Sci.\* \*\*30\*\*, 121–134](#)
- 603 [\(2003\).](#)
- 604 49. [Petkova, D., Novembre, J. & Stephens, M. Visualizing spatial population structure with estimated effective migration](#)
- 605 [surfaces. \*Nat. Genet.\* \*\*48\*\*, 94–100 \(2016\).](#)
- 606 50. [Haak, W. \*et al.\* Massive migration from the steppe was a source for Indo-European languages in Europe. \*Nature\* \*\*522\*\*,](#)
- 607 [207–211 \(2015\).](#)

- 608 51. [Allentoft, M. E. et al. Population genomics of Bronze Age Eurasia. \*Nature\* \*\*522\*\*, 167–172 \(2015\).](#)
- 609 52. [Duggan, A. T. & Stoneking, M. Recent developments in the genetic history of East Asia and Oceania. \*Curr. Opin. Genet. Dev.\* \*\*29\*\*, 9–14 \(2014\).](#)
- 610
- 611 53. [Excoffier, L. & Schneider, S. Why hunter-gatherer populations do not show signs of pleistocene demographic expansions. \*Proc. Natl. Acad. Sci. U. S. A.\* \*\*96\*\*, 10597–10602 \(1999\).](#)
- 612
- 613 54. [Perry, G. H. & Verdu, P. Genomic perspectives on the history and evolutionary ecology of tropical rainforest occupation by humans. \*Quat. Int.\* \*\*448\*\*, 150–157 \(2017\).](#)
- 614
- 615 55. [Campbell, M. C. & Tishkoff, S. A. African genetic diversity: implications for human demographic history, modern human origins, and complex disease mapping. \*Annu. Rev. Genomics Hum. Genet.\* \*\*9\*\*, 403–433 \(2008\).](#)
- 616
- 617 56. [Tishkoff, S. A. et al. The genetic structure and history of Africans and African Americans. \*Science\* \*\*324\*\*, 1035–1044 \(2009\).](#)
- 618 57. [Bryc, K. et al. Genome-wide patterns of population structure and admixture in West Africans and African Americans. \*Proc. Natl. Acad. Sci. U. S. A.\* \*\*107\*\*, 786–791 \(2010\).](#)
- 619
- 620 58. [Pickrell, J. K. et al. The genetic prehistory of southern Africa. \*Nat. Commun.\* \*\*3\*\*, 1143 \(2012\).](#)
- 621 59. [Uren, C. et al. Fine-Scale Human Population Structure in Southern Africa Reflects Ecogeographic Boundaries. \*Genetics\* \*\*204\*\*, 303–314 \(2016\).](#)
- 622
- 623 60. [Behar, D. M. et al. The genome-wide structure of the Jewish people. \*Nature\* \*\*466\*\*, 238–242 \(2010\).](#)
- 624 61. [Behar, D. M. et al. No evidence from genome-wide data of a Khazar origin for the Ashkenazi Jews. \*Hum. Biol.\* \*\*85\*\*, 859–900 \(2013\).](#)
- 625
- 626 62. [Cardona, A. et al. Genome-Wide Analysis of Cold Adaptation in Indigenous Siberian Populations. \*PLoS One\* \*\*9\*\*, e98076 \(2014\).](#)
- 627
- 628 63. [Di Cristofaro, J. et al. Afghan Hindu Kush: where Eurasian sub-continent gene flows converge. \*PLoS One\* \*\*8\*\*, e76748 \(2013\).](#)
- 629
- 630 64. [Fedorova, S. A. et al. Autosomal and uniparental portraits of the native populations of Sakha \(Yakutia\): implications for the peopling of Northeast Eurasia. \*BMC Evol. Biol.\* \*\*13\*\*, 127 \(2013\).](#)
- 631
- 632 65. [Kovacevic, L. et al. Standing at the Gateway to Europe - The Genetic Structure of Western Balkan Populations Based on Autosomal and Haploid Markers. \*PLoS One\* \*\*9\*\*, e105090 \(2014\).](#)
- 633
- 634 66. [Lazaridis, I. et al. Ancient human genomes suggest three ancestral populations for present-day Europeans. \*Nature\* \*\*513\*\*, 409–413 \(2014\).](#)
- 635
- 636 67. [Metspalu, M. et al. Shared and Unique Components of Human Population Structure and Genome-Wide Signals of Positive Selection in South Asia. \*Am. J. Hum. Genet.\* \*\*89\*\*, 731–744 \(2011\).](#)
- 637
- 638 68. [Migliano, A. et al. Evolution of the Pygmy Phenotype: Evidence of Positive Selection from Genome-wide Scans in African, Asian, and Melanesian Pygmies. \*Hum. Biol.\* \*\*85\*\*, \(2013\).](#)
- 639
- 640 69. [Pierron, D. et al. Genome-wide evidence of Austronesian–Bantu admixture and cultural reversion in a hunter-gatherer group of Madagascar. \*Proc. Natl. Acad. Sci. U. S. A.\* \*\*111\*\*, 936–941 \(2014\).](#)
- 641
- 642 70. [Raghavan, M. et al. Upper Palaeolithic Siberian genome reveals dual ancestry of Native Americans. \*Nature\* \*\*505\*\*, 87–91 \(2014\).](#)

- 643 [\(2014\)](#).
- 644 71. [Rasmussen, M. et al. An Aboriginal Australian Genome Reveals Separate Human Dispersals into Asia. \*Science\* \*\*334\*\*, 94–](#)
- 645 [98 \(2011\)](#).
- 646 72. [Rasmussen, M. et al. Ancient human genome sequence of an extinct Palaeo-Eskimo. \*Nature\* \*\*463\*\*, 757–762 \(2010\)](#).
- 647 73. [Reich, D. et al. Denisova Admixture and the First Modern Human Dispersals into Southeast Asia and Oceania. \*Am. J.\*](#)
- 648 [Hum. Genet.](#) **89**, 516–528 (2011).
- 649 74. [Yunusbayev, B. et al. The Caucasus as an Asymmetric Semipermeable Barrier to Ancient Human Migrations. \*Mol. Biol.\*](#)
- 650 [Evol.](#) **29**, 359–365 (2012).
