# 1 Genetic landscapes reveal how human genetic 2 diversity aligns with geography

3 Benjamin Marco Peter<sup>1,2</sup>, Desislava Petkova<sup>3,4</sup> & John Novembre<sup>1,5</sup>

4 <sup>1</sup> Department of Human Genetics, University of Chicago <sup>2</sup> Max Planck Institute for Evolutionary Anthropology, Leipzig,  
5 Germany

6 <sup>3</sup> Wellcome Trust Center for Human Genetics, University of Oxford, UK <sup>4</sup> Present Address: Procter & Gamble,  
7 Brussels, Belgium <sup>5</sup> Department of Ecology & Evolution, University of Chicago

8

9 **Geographic patterns in human genetic diversity carry footprints of population history<sup>1,2</sup>**  
10 **and provide insights for genetic medicine and its application across human**  
11 **populations<sup>3,4</sup>. Summarizing and visually representing these patterns of diversity has**  
12 **been a persistent goal for human geneticists<sup>5-10</sup>, and has revealed that genetic**  
13 **differentiation is frequently correlated with geographic distance. However, most**  
14 **analytical methods to represent population structure<sup>11-15</sup> do not incorporate geography**  
15 **directly, and it must be considered *post hoc* alongside a visual summary. Here, we use a**  
16 **recently developed spatially explicit method to estimate “effective migration” surfaces to**  
17 **visualize how human genetic diversity is geographically structured (the EEMS method<sup>16</sup>).**  
18 **The resulting surfaces are “rugged”, which indicates the relationship between genetic**  
19 **and geographic distance is heterogenous and distorted as a rule. Most prominently,**  
20 **topographic and marine features regularly align with increased genetic differentiation**  
21 **(e.g. the Sahara desert, Mediterranean Sea or Himalaya at large scales; the Adriatic, inter-**  
22 **island straits in near Oceania at smaller scales). In other cases, the locations of**  
23 **historical migrations and boundaries of language families align with migration features.**  
24 **These results provide visualizations of human genetic diversity that reveal local patterns**  
25 **of differentiation in detail and emphasize that while genetic similarity generally decays**  
26 **with geographic distance, there have regularly been factors that subtly distort the**  
27 **underlying relationship across space observed today. The fine-scale population**  
28 **structure depicted here is relevant to understanding complex processes of human**  
29 **population history and may provide insights for geographic patterning in rare variants**  
30 **and heritable disease risk.**

31

32 In many regions of the world, genetic diversity “mirrors” geography in the sense that genetic  
33 differentiation increases with geographic distance (“isolation by distance”<sup>17-19</sup>); However, due to  
34 the complexities of geography and history, this relationship is not one of constant  
35 proportionality. The recently developed analysis method EEMS visualizes how the isolation-by-  
36 distance relationship varies across geographic space<sup>16</sup>. Specifically, it uses a model based on a  
37 local “effective migration” rate. For several reasons, the effective migration rates inferred by  
38 EEMS do not directly represent levels of gene flow<sup>16</sup>; however they are useful for conveying  
39 spatial population structure: populations in areas of high effective migration are genetically more  
40 similar than other populations at the same geographic distance, and conversely, low migration  
41 rates imply genetic differentiation increases rapidly with distance. In turn, a map of inferred

42 patterns of effective migration can provide a compact visualization of spatial genetic structure  
43 for large, complex samples.

44  
45 We apply EEMS on a combination of 27 existing single nucleotide polymorphism (SNP)  
46 datasets. In total, these comprise 6066 individuals from 419 locations across Eurasia and Africa  
47 (Extended Data Table 1), which we organize in seven analysis panels: an overview Afro-  
48 Eurasian panel (AEA), four continental-scale panels, and two panel of Southern African  
49 KhoeSan and Bantu speakers. For all analysis panels, the inferred EEMS surfaces are  
50 “rugged”, with numerous high and low effective migration features (Fig 1a, Fig 2) that are  
51 strongly statistically supported when compared to a uniform-migration model (Extended Data  
52 Table 2). The regions of depressed effective migration often align in long, connected stretches  
53 that are present in more than 95% of MCMC iterations. To facilitate discussion, we annotate  
54 these stretches with dashed lines and refer to them as “troughs” of effective migration (Figs. 1a,  
55 2, Extended Data Figs. 2-4). Conversely, intermediate- and high-migration areas between  
56 troughs are referred to as corridors.

57  
58 In the broad overview Afro-Eurasia panel (Fig. 1;  $n=4,697$  samples; 370 locales;  $F_{ST} = 0.071$ )  
59 we see that troughs often align with topographical obstacles to migration, such as deserts  
60 (Sahara), seas (Mediterranean, Red, Black, Caspian, East China Seas) and mountain ranges  
61 (Ural, Himalayas, Caucasus). Among the main features are several large regions that have  
62 mostly high effective migration, such as Europe, East Asia, Sub-Saharan Africa and Siberia.  
63 Several large-scale corridors are inferred that represent long-range genetic similarity, for  
64 example: India is connected by two corridors to Europe (a southern one through Anatolia and  
65 Persia ‘SC’, and a northern one through the Eurasian Steppe ‘NC’); East Asia (EA) is connected  
66 to Siberia and to southeast Asia and Oceania. The island populations of the Andaman islands  
67 (Onge) and New Guinea show troughs nearly contiguously around them – possibly reflecting a  
68 history of relative isolation<sup>20,21</sup>.

69  
70 Analyses on a finer geographic scale highlights subtler features (e.g. compare Europe in Fig. 1  
71 vs Fig. 2a), and reveal that levels of differentiation differ both on both a local and continental  
72 scale (Extended Data Table 2). At these finer scales we continue to see troughs that align with  
73 landscape features, though increasingly we see troughs and corridors that coincide with contact  
74 zones of language groups and proposed areas of human migrations. For example, in Europe  
75 (Fig. 2b) we observe troughs (NS, CE) roughly between where Northern Slavic speaking  
76 peoples currently reside relative to west Germanic speakers, and relative to the linguistically  
77 complex Caucasus region. In India (Fig. 2e), troughs demarcate regions with samples of  
78 Austroasiatic and Dravidian speakers, as well as central India (CI) relative to Northwestern India  
79 (Sindhi, Punjabi) and Pakistan. In Southeast Asia (Fig. 2h), troughs align with several straits in  
80 the Malay archipelago, but we also observe a corridor from Taiwan through Luzon to the Lower  
81 Sunda Islands (LSI), and further to Melanesia, perhaps reflecting the Austronesian expansion.  
82 In Africa (Fig. 2g), a trough aligns with the Sahara desert and extends south-eastward into a  
83 geographic region that is a complex linguistic contact zone with Afro-Asiatic speakers (North),  
84 Nilo-Saharan and Niger-Congo speakers, and linguistic isolates, the Hadza and Sandawe  
85 (South). Notably, the contiguity of the South-East extension of this trough is sensitive to the

86 inclusion of the Hadza and Sandawe (Extended Data Fig. 9). In Sub-Saharan Africa we also find  
87 corridors perhaps reflecting the Bantu expansion from West- into Southern and Eastern Africa,  
88 where contact with Nilo-Saharan speakers resulted in complex local structure. In Southern  
89 Africa, the structure seen in separate EEMS maps prepared for Bantu and Khoe-San speakers  
90 (Fig. 2k/l) appear distinct from each other, illustrating that in some cases, different language  
91 groups can maintain independent genetic structure in the same geographic region.

92  
93 Different data visualization methods invariably emphasize different aspects of the data.  
94 Contrasting with EEMS, we find that the widely used, non-spatial principal component analysis  
95 (PCA) highlights large-scale geography, and the PCA-biplots typically reflect the strongest  
96 gradients of diversity in a panel. For example, PCA highlights differentiation along an Out-of-  
97 Africa differentiation axis in the AEA panel (Fig. 1b), the circum-Mediterranean and circum-  
98 Saharan distribution of diversity in Western Eurasia and Africa, respectively, and gradients from  
99 Europe into East Asia and South Asia in the Central/Eastern Eurasian panel (Fig. 2). On the  
100 other hand, EEMS emphasizes local features, in particular troughs between adjacent groups  
101 that are often imperceptible in the PCA-biplots. This is likely due to geographical information  
102 allowing EEMS to discern subtle structure from effects of uneven sampling<sup>16</sup>. PCA easily  
103 identifies outlier or admixed individuals (e.g. in Africa) that are not made apparent in EEMS  
104 except when exploring model fit to find populations that are fit poorly (Extended Data Fig. 8).  
105 Locally differentiated populations such as the Sardinians, Basques, and Finnish strongly shape  
106 the PCA results (compare Fig. 2d to e.g. ref <sup>17</sup>), whereas they are typically placed in low-  
107 migration regions in EEMS. We also compare the model fit of EEMS and low-rank PCA (using  
108 the first 2, 10 and 100 components) to the observed genetic distances as a means of assessing  
109 how well each low-dimensional approach conveys structure in full genetic data. EEMS performs  
110 better for small-scale panels, but PCA provides a better fit on the larger-scale AEA and CEA  
111 panels (Extended Data Figure 5). We hypothesize EEMS tends to represent local genetic  
112 differences relatively well, and this is supported by an analysis where we stratify the residuals of  
113 genetic distances (Extended Data Fig. 6): In most panels EEMS fits best in the lowest  
114 percentiles (corresponding to local differences), and the fit quality tends to decrease for larger  
115 genetic distances.

116  
117 Overall, the maps we present provide a compact summary of the complex relationship of genes  
118 and geography in human populations. In contrast to methods that identify short bursts of gene  
119 flow (“admixture”) between diverged populations<sup>22–24</sup>, EEMS models local migration between  
120 nearby groups to represent heterogeneous isolation-by-distance patterns. This leads to the first  
121 of a few limitations that must be considered in interpretation. In some cases, isolation-by-  
122 distance may not be the most appropriate model, and human population may overlap spatially  
123 while maintaining differentiation. This can happen either for large periods of time (e.g. Southern  
124 Africa Bantu vs. KhoeSan speakers) or due to recent migration, displacement or admixture  
125 events (e.g. in Central Asia). In cases of population structure due to “outliers”, we found that  
126 running EEMS at the highest resolutions that are computationally feasible results in easier  
127 interpretable plots as the degrees of freedoms of the surface are high enough that these  
128 samples can be placed in regions of isolation.

129

130 Second, the maps inferred here represent a model of gene flow that predicts genetic diversity in  
131 humans sampled today – a fuller representation would represent genetic structure dynamically  
132 through time. This is especially relevant as ancient DNA data have recently suggested human  
133 population structure can be surprisingly dynamic (e.g. ref. <sup>25</sup>).

134

135 Third, the effective migration rates and their scales needs be interpreted with care. In each of  
136 our maps the overall levels of differentiation are consistently low across all populations, and  
137 EEMS draws attention to where differentiation is slightly elevated or depressed relative to  
138 expectations from geographic distance. Low effective migration between a pair of populations  
139 does not imply an absence of migration nor large levels of absolute differentiation; conversely,  
140 high levels of effective migration do not imply ongoing gene flow. The emergence of migration  
141 features in the EEMS maps that align with known topography, past historical migrations, and/or  
142 linguistic/cultural distributions does not prove a causal connection and does not constitute a  
143 formal statistical test. Formally testing the influence of specific features and environmental  
144 variables on migration rates remain important future tasks that will require extending EEMS or  
145 using different frameworks<sup>26</sup>.

146

147

148 Finally, ascertainment decisions of which samples to include will affect the outcome of any  
149 analysis. When there is a feature inferred in a region with few samples, the exact positioning of  
150 the inferred change on the map will be imprecise (e.g. the trough presumably associated with  
151 the English Channel in Fig 2b). The maps of posterior variance (Extended Data Figures 2 and  
152 4) partly convey where there is uncertainty in positioning, but caution is still warranted as the  
153 modelling assumptions will introduce further uncertainty. In other cases, the presence or  
154 absence of a particular group may open or close corridors, sometime depending on resolution.  
155 Examples of this are the Kusundas, a Nepali people with both Tibetan and Indian ancestry  
156 causing a corridor through the Himalayas, the Kalmyk, a mongolian people in Southern Russia  
157 that are linked by a corridor to Mongolia in the CEA, but not the AEA panel, and this corridor  
158 disappears if the Kalmyks are excluded from the analysis and the Hadza and Sandawe, which  
159 cause inference of a trough in Eastern Africa when included.

160

161 Nonetheless, the maps presented here provide a useful representation of human genetic  
162 diversity, that complements results from geography-agnostic methods. Our results emphasize  
163 the importance of geographical features on shaping human genetic history and help describe  
164 fine-scale patterns of human genetic diversity<sup>27</sup>. By using recent large-scale SNP data and a  
165 novel analysis method, our work expands beyond previous studies of gene flow in humans<sup>28-30</sup>.  
166 Our rugged migration landscapes suggest a synthesis of the clusters versus clines paradigms  
167 for human structure<sup>7,8,31</sup>: By revealing both sharp and diffuse features that structure human  
168 genetic diversity, our results suggest that more continuous definitions of ancestry in human  
169 population genetics should complement models of discrete populations with admixture. As rare  
170 disease variants are commonly geographically localized<sup>32,33</sup>, the maps presented here may help  
171 predict regions where clustering of alleles should be expected. The maps also annotate  
172 present-day population structure that ancient DNA and historical/archaeological studies can aim  
173 to explain.



174  
175

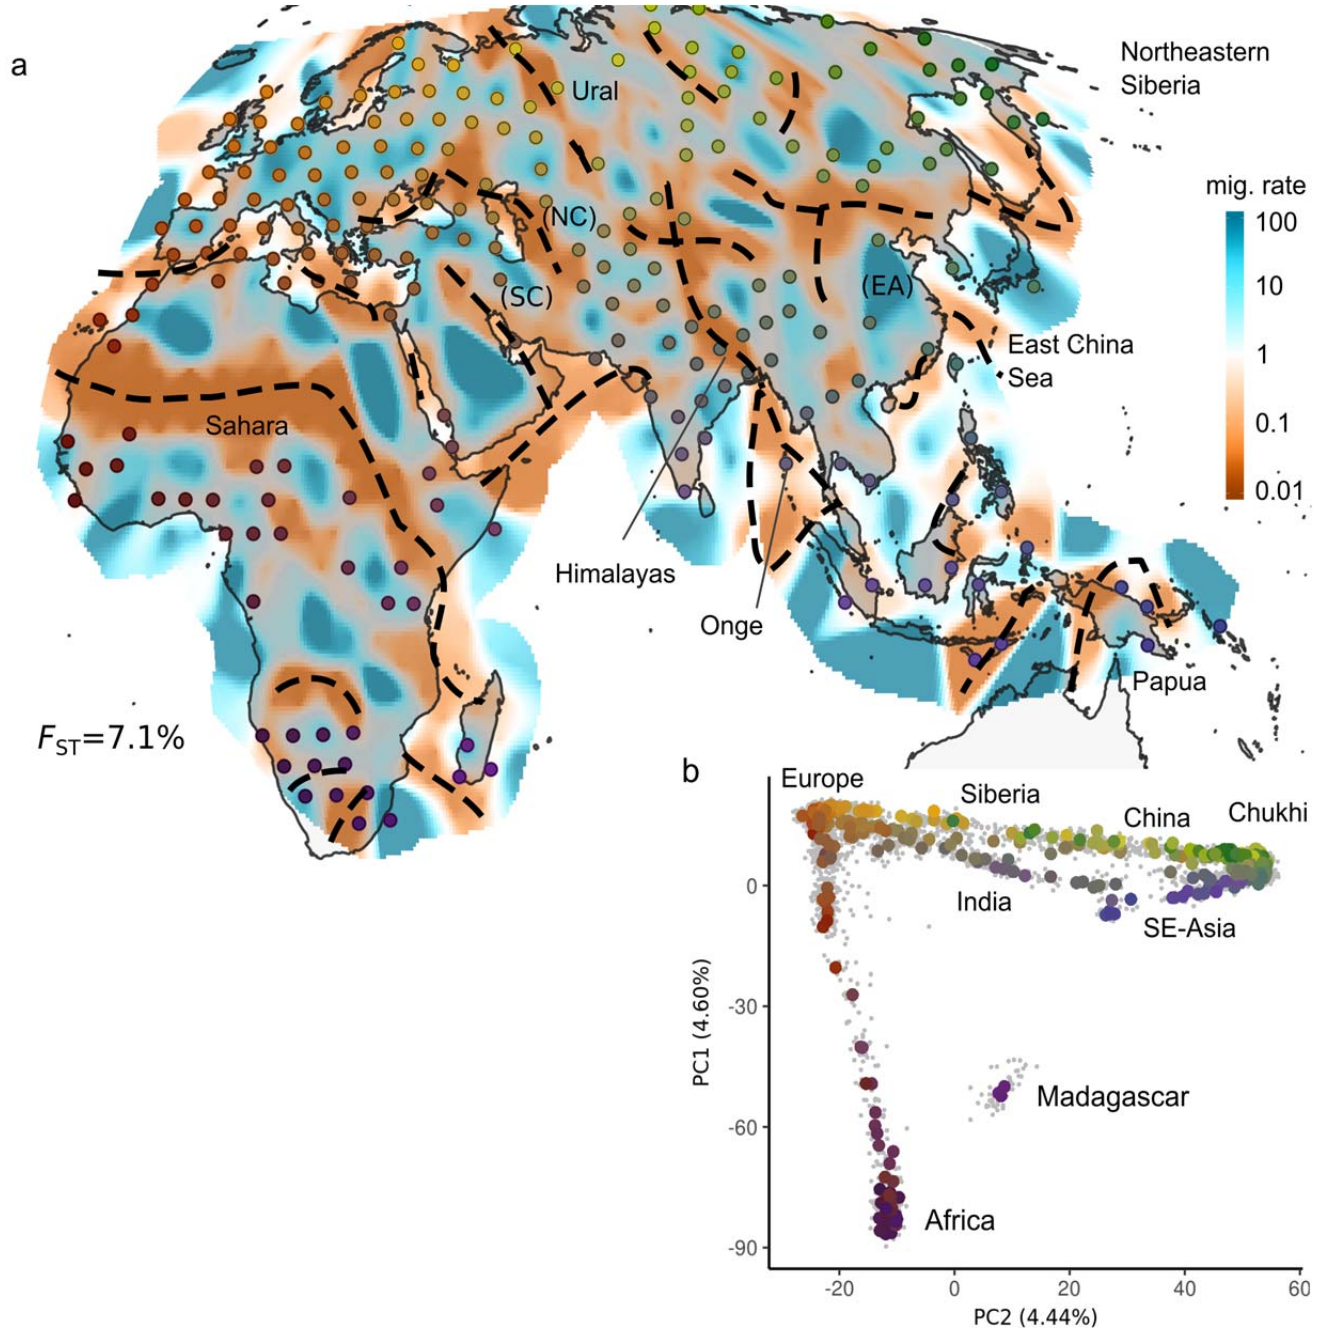

176  
177  
178  
179  
180  
181  
182  
183  
184  
185

**Figure 1: Large-scale patterns of population structure.** a: EEMS posterior mean effective migration surface for Afro-Eurasia (AEA) panel. Regions and features discussed in the main text are labeled. Approximate location of troughs are annotated with dashed lines (see Extended Data Figure 2). b: PCA plot of AEA panel: Individuals are displayed as grey dots, Colored dots reflect median of sample locations; with colors reflecting geography and matching with the EEMS plot. Locations displayed in the EEMS plot reflect the position of populations after alignment to grid vertices used in the model (see methods). For exact locations, see annotated Extended Data Figure 2 and Table S1. The displayed value of  $F_{ST}$  emphasizes the low absolute level of differentiation in human SNP data.

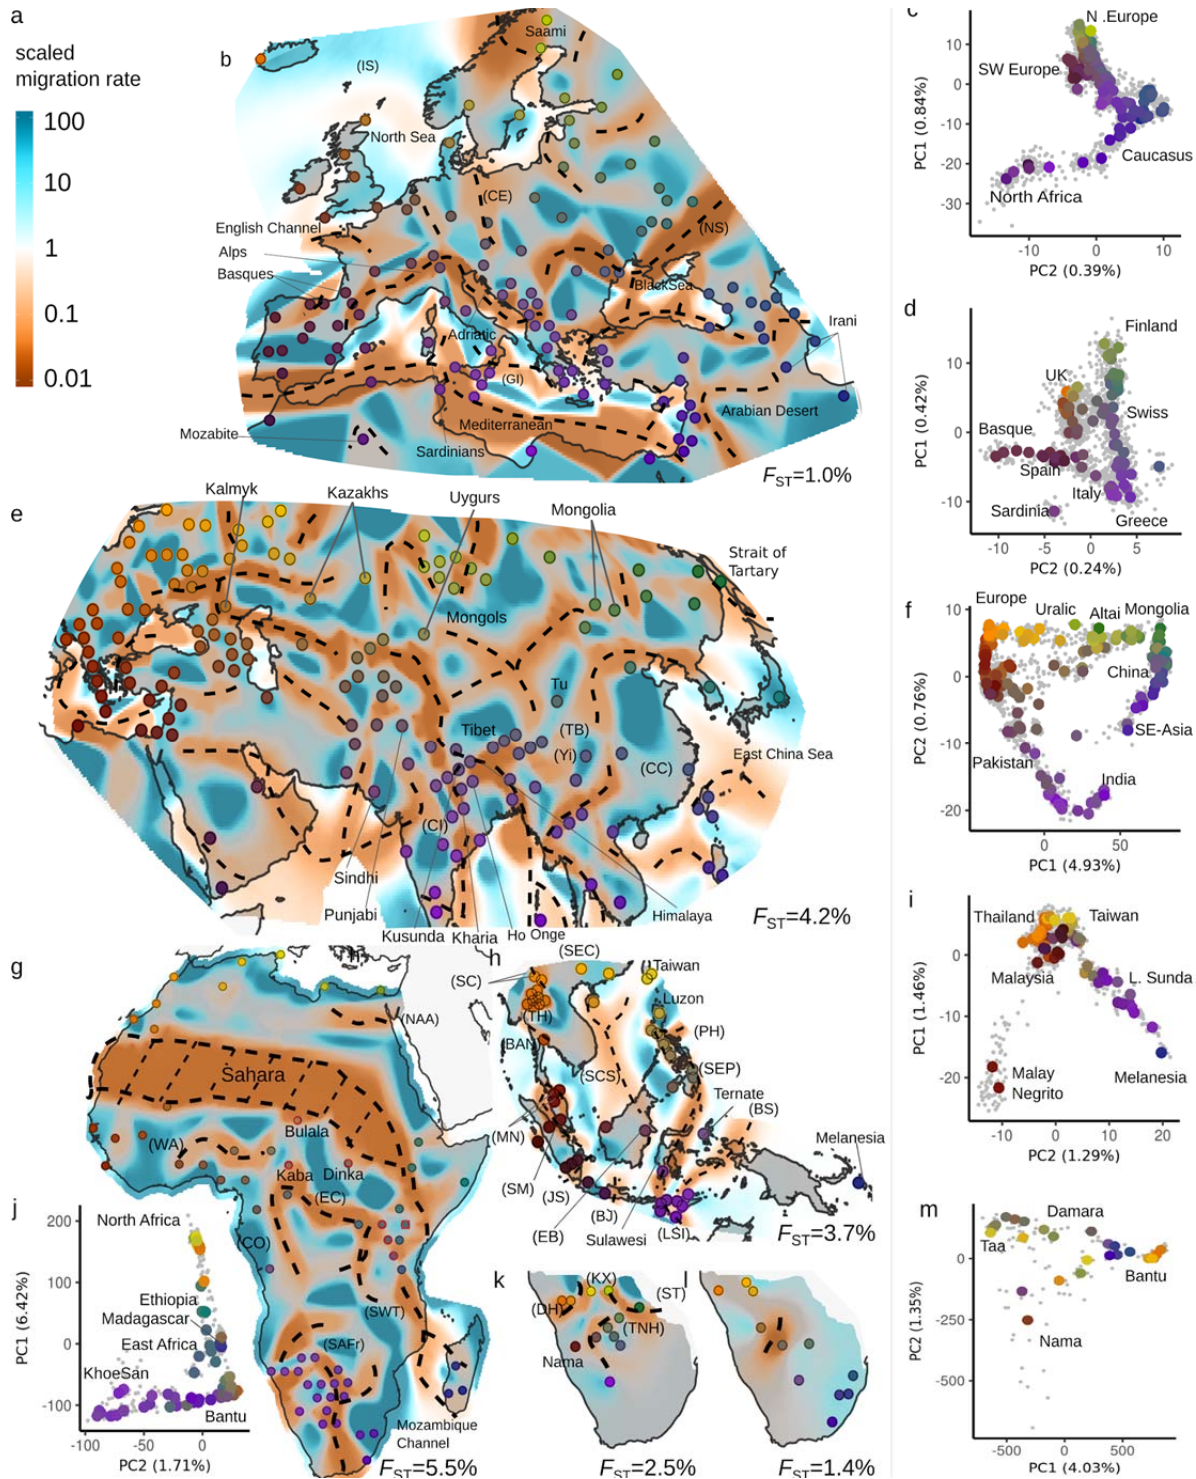

186  
 187  
 188 **Figure 2: Regional patterns of genetic diversity.** **a:** scale bar for relative effective migration rate. Posterior effective migration  
 189 surfaces for **b:** Western Eurasia (WEA) **e:** Central/Eastern Eurasia (CEA) **g:** Africa (AFR) **h:** South East Asian (SEA) **k:** Southern  
 190 African KhoesSan (SAKS) **i:** Southern African Bantu (SAB) analysis panels.; In panel **g**, red circles indicate Nilo-Saharan speakers.  
 191 Approximate location of troughs are shown with dashed lines (see Extended Data Figure 4). PCA plots: **c:** WEA **d:** Europeans in  
 192 WEA **f:** CEA **i:** SEA **j:** AFR **m:** SAHG+SAB. Individuals are displayed as grey dots. Large dots reflect median PC position for a  
 193 sample; with colors reflecting geography matched to the corresponding EEMS figure. In the EEMS plots, approximate sample  
 194 locations are annotated. For exact locations, see annotated Extended Data Figure 4 and Table S1. Features discussed in the main  
 text and supplement are labeled.  $F_{ST}$  values per panel emphasize the low absolute levels of differentiation.

## 195 References

- 196 1. Veeramah, K. R. & Hammer, M. F. The impact of whole-genome sequencing on the reconstruction of human population history.  
197 *Nat. Rev. Genet.* **15**, 149–162 (2014).
- 198 2. Schraiber, J. G. & Akey, J. M. Methods and models for unravelling human evolutionary history. *Nat. Rev. Genet.* **16**, 727–740  
199 (2015).
- 200 3. Bustamante, C. D., Burchard, E. G. & De la Vega, F. M. Genomics for the world. *Nature* **475**, 163–165 (2011).
- 201 4. Popejoy, A. B. & Fullerton, S. M. Genomics is failing on diversity. *Nature* **538**, 161–164 (2016).
- 202 5. Roberts, L. How to sample the world’s genetic diversity. *Science* **257**, 1204–1205 (1992).
- 203 6. Cavalli-Sforza, L. L., Menozzi, P. & Piazza, A. *The History and Geography of Human Genes*. (Princeton University Press,  
204 1994).
- 205 7. Rosenberg, N. A. *et al.* Genetic structure of human populations. *Science* **298**, 2381–2385 (2002).
- 206 8. Serre, D. & Pääbo, S. Evidence for gradients of human genetic diversity within and among continents. *Genome Res.* **14**, 1679–  
207 1685 (2004).
- 208 9. International HapMap Consortium. A haplotype map of the human genome. *Nature* **437**, 1299–1320 (2005).
- 209 10. The 1000 Genomes Project Consortium. A global reference for human genetic variation. *Nature* **526**, 68–74 (2015).
- 210 11. Pritchard, J. K., Stephens, M. & Donnelly, P. Inference of population structure using multilocus genotype data. *Genetics* **155**,  
211 945–959 (2000).
- 212 12. Pickrell, J. K. & Pritchard, J. K. Inference of population splits and mixtures from genome-wide allele frequency data. *PLoS*  
213 *Genet.* **8**, e1002967 (2012).
- 214 13. Patterson, N., Price, A. L. & Reich, D. Population structure and eigenanalysis. *PLoS Genet.* **2**, e190 (2006).
- 215 14. Lawson, D. J., Hellenthal, G., Myers, S. & Falush, D. Inference of population structure using dense haplotype data. *PLoS*  
216 *Genet.* **8**, e1002453 (2012).
- 217 15. Lipson, M. *et al.* Efficient moment-based inference of admixture parameters and sources of gene flow. *Mol. Biol. Evol.* **30**,  
218 1788–1802 (2013).
- 219 16. Petkova, D., Novembre, J. & Stephens, M. Visualizing spatial population structure with estimated effective migration surfaces.  
220 *Nat. Genet.* **48**, 94–100 (2016).
- 221 17. Novembre, J. *et al.* Genes mirror geography within Europe. *Nature* **456**, 98–101 (2008).
- 222 18. Ramachandran, S. *et al.* Support from the relationship of genetic and geographic distance in human populations for a serial  
223 founder effect originating in Africa. *Proc. Natl. Acad. Sci. U. S. A.* **102**, 15942–15947 (2005).
- 224 19. Wang, C., Zöllner, S. & Rosenberg, N. A. A Quantitative Comparison of the Similarity between Genes and Geography in  
225 Worldwide Human Populations. *PLoS Genet.* **8**, e1002886 (2012).
- 226 20. Reich, D., Thangaraj, K., Patterson, N., Price, A. L. & Singh, L. Reconstructing Indian population history. *Nature* **461**, 489–494  
227 (2009).
- 228 21. Pugach, I., Delfin, F., Gunnarsdóttir, E., Kayser, M. & Stoneking, M. Genome-wide data substantiate Holocene gene flow from  
229 India to Australia. *Proc. Natl. Acad. Sci. U. S. A.* **110**, 1803–1808 (2013).



- 230 22. Patterson, N. J. *et al.* Ancient Admixture in Human History. *Genetics* **112**, 145037 (2012).
- 231 23. Loh, P.-R. *et al.* Inferring admixture histories of human populations using linkage disequilibrium. *Genetics* **193**, 1233–1254
- 232 (2013).
- 233 24. Hellenthal, G. *et al.* A Genetic Atlas of Human Admixture History. *Science* **343**, 747–751 (2014).
- 234 25. Lazaridis, I. *et al.* Ancient human genomes suggest three ancestral populations for present-day Europeans. *Nature* **513**, 409–
- 235 413 (2014).
- 236 26. Hanks, E. M. & Hooten, M. B. Circuit Theory and Model-Based Inference for Landscape Connectivity. *J. Am. Stat. Assoc.* **108**,
- 237 22–33 (2013).
- 238 27. Baker, J. L., Rotimi, C. N. & Shriner, D. Human ancestry correlates with language and reveals that race is not an objective
- 239 genomic classifier. *Sci. Rep.* **7**, 1572 (2017).
- 240 28. Barbujani, G. & Sokal, R. R. Zones of sharp genetic change in Europe are also linguistic boundaries. *Proc. Natl. Acad. Sci. U.*
- 241 *S. A.* **87**, 1816–1819 (1990).
- 242 29. Barbujani, G. & Belle, E. M. S. Genomic boundaries between human populations. *Hum. Hered.* **61**, 15–21 (2006).
- 243 30. Pagani, L. *et al.* Genomic analyses inform on migration events during the peopling of Eurasia. *Nature* **538**, 238–242 (2016).
- 244 31. Rosenberg, N. A. *et al.* Clines, clusters, and the effect of study design on the inference of human population structure. *PLoS*
- 245 *Genet.* **1**, e70 (2005).
- 246 32. Gibson, G. Rare and common variants: twenty arguments. *Nat. Rev. Genet.* **13**, 135–145 (2012).
- 247 33. Mathieson, I. & McVean, G. Differential confounding of rare and common variants in spatially structured populations. *Nat.*
- 248 *Genet.* **44**, 243–246 (2012).

## 249 Material and Methods

### 250 Merging pipeline

251 We obtained SNP genotype data from 27 different studies (Extended Data Table 1). Processing

252 was done using a reproducible snakemake pipeline<sup>34</sup> available under

253 <http://github.com/NovembreLab/eems-merge>, heavily relying on plink 1.9<sup>35</sup> for handling

254 genotypes. The sources differ in the input format and pre-processing, however in general we

255 performed the following steps:

256

- 257 1. Remove all non-autosomal, non-SNP variants
  - 258 2. Map SNP to forward strand of human reference genome b37 coordinates using chip
  - 259 manufacturer metadata files or SNP identifiers
  - 260 3. Remove strand-ambiguous A/T and G/C variants
- 261

262 The remaining SNPs were then merged using successive plink --bmerge commands into a

263 single master dataset with 9,003 individuals and 1.9M SNPs but a total genotyping rate of only

264 20.6%. 46 SNPs were removed because different studies reported different alternative alleles.

265 We used a relationship filter of 0.6 using the "--rel-cutoff 0.6" flag in plink to remove 667 closely



266 related individuals or duplicates. After merging, each analysis panel had missingness rates  
267 <0.5% (AEA=0.2%, WEA=0.3%, CEA=0.2%, SEA=0.5%, AFR=0.2%, SAHG=0.1%). In all  
268 panels, all SNPs passed a one-sided HWE-test ( $p$ -value <  $10^{-5}$ ), with the exception of SEA,  
269 where nine (out of 7553 SNPs) failed and were excluded.

## 270 Data Retrieval and Filtering

### 271 Human Origins data set<sup>25</sup>

272 Sampling location information was obtained from table S9.4 of ref. <sup>25</sup>, and the data were shared  
273 by David Reich. We used the population information in the `vdata` subset of all ascertainment  
274 panels, except for the analysis where we assess ascertainment bias. The utility `convert` from  
275 `admixtools`<sup>22</sup> was used to convert the data into plink format.

### 276 Estonian Biocentre data

277 The data generated by the Estonian Biocentre<sup>36</sup> were provided in plink format by Mait Metspalu  
278 on 10/30/15, along with location information where it was available. This data set contained  
279 1,282,568 SNPs. Of those, 6770 SNPs had non-unique ids and were removed.

### 280 HUGO Pan-Asian SNP consortium<sup>37</sup>

281 The data were downloaded on 6/24/15 from [www.biotec.or.th/PASNP](http://www.biotec.or.th/PASNP). Location-metadata were  
282 obtained on the same day from the map on the same website, and individuals were matched to  
283 populations using the individual identifiers. All individuals with the same tag were assigned the  
284 median of all locations from that tag. The data were first lifted onto hg19 (with 5 out of 54794  
285 SNPs being removed), and then re-formatted into binary plink format. Due to the small size of  
286 the chip used and the low overlap with the human origins array in particular, we only consider  
287 this data in the South-East Asian panel.

### 288 Uniform global sample<sup>38</sup>

289 This data were downloaded on 6/20/15 from [http://jorde-](http://jorde-lab.genetics.utah.edu/pub/affy6_xing2010/)  
290 [lab.genetics.utah.edu/pub/affy6\\_xing2010/](http://jorde-lab.genetics.utah.edu/pub/affy6_xing2010/). Sampling locations were provided by Jinchuan Xing.  
291 We used version 32 of the annotation file obtained on 6/19/15 from [affymetrix.com](http://affymetrix.com) to map SNPs  
292 onto hg19, remove strand-ambiguous SNPs and to flip SNPs that were on the minus-strand.

### 293 POPRES data<sup>39</sup>

294 POPRES data were obtained under dbGAP study accession phs000145 to John Novembre,  
295 and we used the data as processed in ref <sup>17</sup>, and only retain individuals for which all  
296 grandparents were from the same country, and labelled the Swiss sample according to self-  
297 reported language. We used version 32 of the annotation file obtained on 6/19/15 from  
298 [www.affymetrix.com](http://www.affymetrix.com) ("Mapping250K\_sp.na32.annot.csv" and  
299 "Mapping250K\_Sty.na32.annot.csv") to filter SNPs that did not map onto hg19 and we removed  
300 strand-ambiguous AT and GC polymorphisms.

## 301 African data

302 Data from refs <sup>40,41</sup> were obtained on 04/19/17 from David Comas' website under  
303 <http://www.biologiaevolutiva.org/dcomas/?p=607>. We used version 32 of the annotation file  
304 "GenomeWideSNP\_6.na32.annot.csv" obtained on 6/19/15 from affymetrix.com to map SNPs  
305 onto hg19, remove strand-ambiguous SNPs and to flip SNPs that were on the minus-strand.

## 306 South-East Asian data<sup>42</sup>

307 The data were obtained on 7/14/15 from Mark Stoneking in three different source files. After  
308 merging the three different source files, SNPs not mapping to hg19 using the annotation file  
309 "GenomeWideSNP\_6.na32.annot.csv" were removed, as were AT and GC SNPs. Sampling  
310 locations were extracted from Figure 1 of ref <sup>42</sup>

## 311 Mediterranean Panel<sup>43</sup>

312 Data were obtained on 8/13/15 in binary plink format from  
313 [http://drineas.org/Maritime\\_Route/RAW\\_DATA/PLINK\\_FILES/MARITIME\\_ROUTE.zip](http://drineas.org/Maritime_Route/RAW_DATA/PLINK_FILES/MARITIME_ROUTE.zip).  
314 Sampling location information was obtained from Supplementary Table 3 in ref. <sup>43</sup>. SNPs not  
315 mapping to hg19 using the annotation file "GenomeWideSNP\_6.na32.annot.csv" were removed,  
316 as were AT and GC SNPs.

## 317 Tibetan and Himalayan data

318 Data from refs <sup>44-46</sup> were obtained from Choongwon Jeong and Anna Di Rienzo. We used the  
319 same filtering as in the <sup>44</sup> study, but only added the samples originating from these three studies  
320 with permission from the respective authors.

## 321 Combining Meta-information

322 All sources with the exception of the Estonian Biocentre data provided (approximate) sampling  
323 coordinates. However, the level of accuracy varied between sources, with some providing  
324 specific ethnicities, some (such as POPRES) only providing country information and others just  
325 providing city- or state-level information. For POPRES-derived data, and most countries, we  
326 assigned individuals to the country's centerpoint, with the exception of Sweden and Finland,  
327 which were assigned their capital. For the Estonian Biocentre data, sampling location data were  
328 highly heterogeneous. Samples that could not be confidently assigned to a region with an  
329 accuracy of 100km were excluded. For populations with samples from multiple studies, the  
330 most accurate source location was used. For locations covered with different accuracy, only the  
331 most accurate samples were retained. For example, we dropped all Spanish individuals from  
332 POPRES (only country level data), as the Human Origins data provided higher resolution, with  
333 samples from eleven different regions in Spain. The resulting table is given as Table S1.

334

## 335 Language data

336 To validate troughs correlating with presumed language barriers, we cross-referenced the  
337 genetic data with linguistic data from the Glottolog 3.2 database <sup>47</sup>. To do so, we compared the

338 correlation of pairwise genetic distance and geographic distances within and between pairs of  
339 language groups. As there was frequently no primary data recording the language of speakers,  
340 we proceeded as follows: For population identifiers that correspond to languages / or ethnic  
341 groups with a clear majority language, we used that language. For samples with country-level  
342 information where the country has a clear majority language (e.g. Germany, Slovenia), that  
343 language was assigned (Table S1). Otherwise, if a sample was from a region with a clear  
344 majority language that is not obviously due to recent colonization, that language was assigned.  
345 All other samples were not assigned a language. For simplicity, we group Nilotic, Central  
346 Sudanic and Mande languages into “Nilo-Saharan”, Khoe, Kxa and Tuu speakers into  
347 “KhoeSan” and Armenic, Circassian, Kartvelian and Nakh-Daghesanian into “Caucasus”. For all  
348 troughs we hypothesize that they align with boundaries between linguistic groups, we now  
349 perform a partial mantel test comparing genetic distances and language groups as a categorical  
350 variable using the implementation in the R-package “vegan”<sup>48</sup>. We note that results need to be  
351 interpreted cautiously, as the mantel test is generally poorly calibrated for spatially  
352 autocorrelated data<sup>49</sup>.

353

#### 354 Samples omitted from model fitting

355 Besides samples whose geographic origin we could not unambiguously assign (n=74), we  
356 removed a small number of samples that would violate some assumptions of the EEMS model.  
357 In particular, we excluded all Jewish samples (n=379), due to complexity of the diaspora and  
358 subsequent local admixture<sup>50</sup>) and Han-Chinese in Taiwan and Singapore(n=170), who both are  
359 recent migrant population to those locales. To avoid any possible distortion due to uneven  
360 sampling, we downsampled all single locales to at most 50 individuals, drawn independently for  
361 different panels. This resulted in a total of 6066 individuals used in at least one panel (Table  
362 S1).

#### 363 Visualization pipeline

364 We developed a second pipeline using snakemake<sup>34</sup> to perform all subsetting and demographic  
365 analyses, available under [github.com/NovembreLab/eems-around-the-world](https://github.com/NovembreLab/eems-around-the-world). The pipeline  
366 allows for defining panels using a flexible set of features, latitudinal and longitudinal boundaries,  
367 continent or country of samples, source study, as well as the addition and exclusion of particular  
368 samples or populations. Based on these subsets, different modules allow performing EEMS and  
369 PCA analyses, as well as generating all the figures, that were then annotated using inkscape.  
370 All configuration variables are stored in json and yaml config files. We perform EEMS and PCA  
371 for each panel independently. Structural variants are a potential confounding factor for genome-  
372 wide SNP based analysis. In PCA, these variants may result in a number of neighboring SNP in  
373 high LD to have very high loadings, thus overemphasizing the effect of these variants. For this  
374 reason, it is advisable to remove regions containing SNP that have extremely high loadings on  
375 some Principal component. Thus, for each panel, we perform a preliminary PCA analysis using  
376 flashpca<sup>51</sup>. The loading-scores for each PC were normalized by dividing them by the standard  
377 deviations on each PC [ $\text{outlier\_score} = L[i]/\text{sd}(L[i])$  ], and then we removed a 200kb window

378 around any SNP for which  $|\text{outlier\_score}| > 5$ . We also dropped individuals with more than 5%  
379 missingness, and SNPs with more than 1% missing data from each panel.

## 380 EEMS

381 To generate the map surfaces, we must choose a grid size and boundaries. Choosing a  
382 coarse grid results in faster computation, but only produces a map with broad-scale patterns. A  
383 finer grid, on the other hand, is able to reveal more details, but at a steep increase in  
384 computational cost and with an increased danger of introducing patterns that are harder to  
385 interpret. Grid density and sizes are given in Extended Data Table 1, along with population  
386 level  $F_{ST}$  calculated using plink, and  $F_{ST}$  based on the mean migration rate inferred by eems and  
387 equilibrium stepping stone model theory<sup>52</sup>.

388  
389 We evaluated the impact of SNP ascertainment bias by running EEMS on the multiple,  
390 documented SNP ascertainment panels of the Human Origins data<sup>25</sup>. We found that while  
391 ascertainment bias has an effect on the heterozygosity surfaces that EEMS estimates, the  
392 migration surfaces remain relatively unaffected (Extended Data Fig. 1). Therefore, we restrict  
393 our presentation to the migration surfaces.

394  
395 For each panel, we performed four pilot runs of 2-8 million iterations each. The run with the  
396 highest likelihood was then used for a second set of four runs of 4-10 million iteration each, with  
397 the first 500,000 million discarded as burn-in. Number of iteration were chosen such that total  
398 computation time was around 10 days. Every 20,000th iteration was sampled. EEMS  
399 approximates a continuous region with a triangular grid, which has to be specified. We  
400 generated global geodesic graphs at three resolutions (approximate distance between demes of  
401 120, 240 and 500km, respectively) using dggrid v6.1<sup>53</sup> and intersected these graphs with the  
402 area representing each panel (Extended Figures 2,3). All other (hyper-)parameters were kept at  
403 their default values<sup>16</sup>. We compared EEMS to an isolation-by-distance model with a constant  
404 migration rate by re-fitting EEMS allowing only a single migration rate tile, but arbitrary diversity  
405 rate tiles using the otherwise same settings. The resulting log Bayes Factors are given in  
406 Extended Data Table 2.

## 407 Evaluating fit of EEMS and PCA to genetic distances

408 For EEMS, the posterior samples imply an expected distance matrix between populations. For  
409 PCA, the components and their loadings provide an approximation to the genetic distance  
410 matrix between individuals. We use the median PCA values of individuals across ten PC  
411 components to produce an expected genetic distance matrix between populations. We use ten  
412 PC components as most investigators evaluate population structure based on only the first  
413 several PCs. For each method the expected genetic distance matrices are compared to the  
414 observed matrices using a simple linear correlation computed between all pairwise distances.



## 415 Acknowledgements

416 We are grateful for helpful comments from Choongwon Jeong, Matthew Stephens, Anna Di  
417 Rienzo, Melinda A. Yang, Joshua G. Schraiber and members of the Novembre lab. This  
418 research was supported by research grants NIH/NCI U01 CA198933 and NIH/NIGMS R01  
419 GM108805 (J. N. and B. M. P) and by a Swiss National Science Foundation early postdoc  
420 mobility fellowship (B. M. P.). We acknowledge the University of Chicago Research Computing  
421 Center for support of this work. We dedicate the paper in memoriam of Brad McRae (1966-  
422 2017) whose work on resistance distances underlies the EEMS methodology.

423

424 Author contributions.

425 B.M.P. analyzed data. B.M.P., D.P., and J.N. interpreted results. B.M.P and J.N conceived the  
426 study and wrote the manuscript.

## 427 Competing financial interests

428 The authors declare no competing financial interests.

## 429 Correspondence to:

430 Benjamin Peter ([benjamin\\_peter@eva.mpg.de](mailto:benjamin_peter@eva.mpg.de)), or John Novembre ([jnovembre@uchicago.edu](mailto:jnovembre@uchicago.edu))

## 431 Supplementary Text on Regional Scale Analyses

432 Here we provide a more expanded discussion of the regional-scale results. To help identify  
433 features that we discuss, we have added labels to discussed features in the figures, and refer to  
434 them in the text here in parentheses. The labels are typically capitalized abbreviations and in  
435 some cases are full words.

436

437 **Western Eurasia.** Europe appears largely homogeneous in the Afro-Eurasia panel, but a finer-  
438 scale analysis (Western Eurasia panel, Fig. 2a;  $n=2,049$ ; 122 locales,  $F_{ST}=0.010$ ) reveals  
439 abundant fine-scale structure: bodies of waters are consistently covered by lower effective  
440 migration regions, with migration being lower in southern seas (Mediterranean, Adriatic, Black  
441 Sea) relative to those in northern Europe (North Sea, Irish Sea, English Channel). Terrestrial  
442 barriers are observed in: the Alps (and an adjacent region extending into Southern France),  
443 surrounding the Mozabites in Tunisia and the Saami in Scandinavia, the western and northern  
444 edges of the Arabian Desert (though we note the region has few samples). Troughs reflecting  
445 historical domains are observed: between Germanic and Northern Slavic-speakers (CE,  
446 Extended Data Figure 7) and between domains of Slavic-speakers and the Caucasus (NS).  
447 Remaining regions are generally inferred to have average or above average migration, with one  
448 obvious corridor being that between Iceland and Scandinavia (IS), presumably due to the recent  
449 colonization of Iceland. One interesting feature is an area of East-West low migration between  
450 the Italian peninsula and Greece (GI). A corridor between Crete and Sicily is inferred south of it,  
451 and between mainland Greece and southern Italy north of it. This likely reflects a pattern of

452 close genetic similarity among coastal Mediterranean populations observed previously<sup>43</sup> but  
453 suggests it may have north-south structure. Ancient DNA results suggest that the patterns we  
454 observe are recent<sup>54,55</sup> and have been shaped in the last 3,000-5,000 years with contributions  
455 from multiple sources. Strikingly, proposed expansion routes through the Eurasian Steppe and  
456 Levant into Europe partially align with corridors of high effective migration.

457  
458 **Central/Eastern Eurasia.** The Central/Eastern Eurasia surface (Fig. 2e;  $n=2,578$ ; 181 locales,  
459  $F_{ST}=0.042$ ) is overall similar to the patterns seen in the AEA panel, with a trough through the  
460 Himalayas/Tien-Shan but we observe a corridor from Mongolia to the Caspian Sea, possibly  
461 reflecting the Mongol empire, as the Kalmyk, Kazhaks, and Uygurs all have well documented  
462 Mongolian-like genetic ancestry. The presence of this corridor depends on a small number of  
463 samples; if Uygurs and Kalmyks are removed, we find a pattern similar to that in the AEA panel  
464 in that region.

465  
466 Where the global analysis did not reveal any strong patterns in South Asia, at the higher  
467 resolution we observe troughs in the Indian subcontinent between a central Indian region (CI) of  
468 mainly Indo-Aryan languages and an Eastern and Southern region with two Austroasiatic  
469 speaking (Kharia, Ho), and Dravidian speaking populations, but this trough is not significantly  
470 correlated with linguistic group (Extended Data Figure 7d) We also find that the Himalayas  
471 generate a trough between India and Tibet, but the Kusunda population adds a corridor there,  
472 which is explained by the fact that they have both Tibetan and Indian ancestry<sup>56</sup>.

473  
474 In East Asia, we observe marine troughs in the East China Sea, strait of Tartary and the  
475 Andaman Sea (Onge). Terrestrially, we observe troughs between coastal China (CC), a central  
476 region with several Tibeto-Burman samples (TB, along with the Tu who speak a Mongolic  
477 language, and have been suggested to have received European admixture 1,200y ago<sup>24</sup>), and a  
478 western region anchored by Tibetan samples. The coastal Chinese region contains a high-  
479 effective-migration area that extends into Korea and Japan.

480  
481 Overall, the Central/East Asia panel is particularly complex with one of the lowest levels of  $r^2$   
482 between EEMS expected genetic distances and the observed distances ( $r^2 = 0.66$ , Extended  
483 Data Fig. 5), and the residuals are very high (Extended Data Fig. 8). This is expected as the  
484 relatively open steppe has been the site of repeated long-range population movements and  
485 invasions, by e.g. Bronze Age Steppe populations, Mongols and Turkic speakers, that we  
486 expect are difficult to depict using the model of steady-state gene flow model fit by EEMS.

487  
488 **South-East Asia.** In the South-East Asian panel ( $n=1,054$ , 58 locales;  $F_{ST}=0.037$ ; Fig. 2k)  
489 troughs align with the many seas and channels in this region: the South-Chinese Sea (SCS),  
490 the waterway running east of the Philippines (PH) and Sulawesi south to the Flores Sea (SEP),  
491 the waterway between western New Guinea into the Banda Sea (BS), the Malacca strait  
492 between Sumatra and Malaysia (SM), the Sunda Strait between Java and Sumatra (JS), the  
493 Java Sea between Bali and Java (BJ), as well as the Makassar strait and Celebes Sea between  
494 Borneo and Sulawesi (EB). Two corridors, one from Taiwan/Luzon through Western Mindanao  
495 to Sulawesi, and one from Ternate through the Lower Sunda Islands (LSI) into Melanesia

496 possibly reflect the Austronesian expansion that started roughly 3,000 years ago<sup>57</sup>. On the  
497 mainland, we find low effective migration north of Bangkok (BAN) and near samples from  
498 Northern Thailand (TH) (including the Southern Chinese Wa and Jinuo samples (SC)). These  
499 two samples have low inferred effective migration with South-Eastern Chinese samples (SEC).  
500 Two Malay Negrito samples in Northern Malaysia (MN) are placed in a trough, revealing their  
501 genetic distance to other South-East Asian populations also apparent on PC2 (Figure 2l).  
502

503 **Africa.** In Africa (AFR,  $n=749$ , 71 locales,  $F_{ST}=0.055$ ; Fig. 2g) two troughs corresponding to the  
504 Sahara desert and Mozambique Channel are observed. In Northern Africa (NAA), we see a  
505 small trough of low effective migration separating two latitudinal corridors; one following the  
506 Mediterranean coast and one inland (Fig 2g). The inland corridor disappears in our lower-  
507 resolution Afro-Eurasia panel (Figure 1a) and presumably reflects Sub-Saharan ancestry in  
508 some Moroccans, perhaps through trans-Saharan trade.  
509

510 In the AFR-panel, we observe a trough reflecting the language group boundaries between  
511 Niger-Congo and Afro-Asiatic language speakers<sup>58</sup> (Extended Data Figure 7), with the West-  
512 African Afro-Asiatic speaking Hausa and Mada being placed in a barrier together with the  
513 admixed Fulani<sup>59</sup>. West Africa appears as a high-gene-flow region (WA), and two corridors  
514 pass from Nigeria - one along the coast of Congo (CO) southwards and another further east  
515 (EC) connecting to Kenya and Tanzania. In both Central and Eastern Africa Nilo-Saharan and  
516 Niger-Congolese speakers overlap, resulting in low effective migration uncorrelated with langu:  
517 the Nilo-Saharan Kaba, Dinka and Bulala are in a region of high gene flow, separated by a  
518 trough from the Biaka and Mbuti Pygmies. Southern and Eastern Africans are separated by low  
519 effective migration through Mozambique and South-Western Tanzania (SWT).  
520

521 **Southern Africa** Patterns in southern Africa are complex, with a troughs separating out  
522 Western Bantu speaking populations, and the KhoeSan Khwe and Xuun. Stratifying Southern  
523 Africans into a KhoeSan (SAKS,  $n=109$ , 16 locales,  $F_{ST}=0.025$ , Fig. 2k) and Bantu speakers  
524 (SAB,  $n=30$ , 11 locales,  $F_{ST}=0.014$ ; Fig. 2l) reveals very different spatial structure. The Bantu  
525 speakers are separated by a single barrier into an eastern and western location. For the South  
526 African Hunter-Gatherers most samples fall into a central region with high effective migration,  
527 including the Taa, Naro and Hoan (TNH). Troughs in the North separate this region from the  
528 Sua and Tswa (ST) and in the south-west from the Khomani and Nama (Nama), respectively.  
529 The remaining samples fall either into a Northern high migration area (Khwe and Xuun, KX) or a  
530 North-Western low migration area (Damara and Haiom, DH). These results are broadly  
531 consistent with existing work on African population structure<sup>59-62</sup>, and emphasize African  
532 population structure appears largely determined by the Sahara desert, the Bantu and Arabic  
533 expansions, and the complex structure of hunter-gatherer groups specifically in South Africa.  
534

535

536 **Extended Data**

537

| Study                     | Abbrev. | Samples | Locations | Source            |
|---------------------------|---------|---------|-----------|-------------------|
| Bryc et al. 2009          | B09     | 121     | 11        | Ref <sup>40</sup> |
| Behar et al. 2010         | Be10    | 295     | 22        | Ref <sup>50</sup> |
| Behar et al. 2013         | B13     | 131     | 20        | Ref <sup>63</sup> |
| Bigham et al. 2010        | Bi10    | 45      | 3         | Ref <sup>45</sup> |
| Chaubey et al. 2011       | C11     | 37      | 5         | Ref <sup>64</sup> |
| Cardona et al. 2014       | C14     | 192     | 37        | Ref <sup>65</sup> |
| Di Cristofaro et al. 2013 | D13     | 14      | 3         | Ref <sup>66</sup> |
| Fedorova et al. 2013      | F13     | 30      | 6         | Ref <sup>67</sup> |
| HUGO Consortium 2009      | H09     | 975     | 47        | Ref <sup>37</sup> |
| Hunter-Zinck et al. 2010  | H10     | 85      | 1         | Ref <sup>41</sup> |
| Jeong et al. 2017         | J17     | 53      | 2         | Ref <sup>44</sup> |
| Kovacevic et al. 2014     | K14     | 70      | 6         | Ref <sup>68</sup> |
| Lazaridis et al. 2014     | L14     | 1590    | 159       | Ref <sup>69</sup> |
| Metspalu et al. 2011      | M11     | 127     | 11        | Ref <sup>70</sup> |
| Migliano et al. 2013      | M13     | 68      | 6         | Ref <sup>71</sup> |
| Nelson et al. 2008        | N08     | 531     | 29        | Ref <sup>39</sup> |
| Paschou et al. 2014       | Pa14    | 626     | 29        | Ref <sup>43</sup> |
| Pierron et al. 2014       | Pi14    | 114     | 5         | Ref <sup>72</sup> |
| Raghavan et al. 2014      | R14     | 83      | 9         | Ref <sup>73</sup> |
| Rasmussen et al. 2010     | R10     | 101     | 9         | Ref <sup>74</sup> |
| Rasmussen et al. 2011     | Ra11    | 19      | 3         | Ref <sup>56</sup> |
| Reich et al. 2011         | Re11    | 106     | 16        | Ref <sup>75</sup> |
| Skoglund et al. 2014      | S14     | 15      | 1         | Ref <sup>76</sup> |
| Xing et al. 2010          | X10     | 92      | 4         | Ref <sup>38</sup> |
| Xu et al. 2011            | X11     | 28      | 3         | Ref <sup>46</sup> |
| Yunusbayev et al. 2012    | Y12     | 183     | 14        | Ref <sup>77</sup> |
| Yunusbayev et al. 2015    | Y15     | 299     | 42        | Ref <sup>36</sup> |

538 **Extended Data Table 1:** Data Sources. Abbrev: Abbreviation; Ind: total number of individuals;  
 539 Loc. Number of unique sample locations

540



541

| Panel                   | Abb. | Ind. | Locations | SNPs   | Grid Size<br>(# of demes) | Resolution<br>(km) | $F_{ST}$ | Model-fit $F_{ST}$<br>(adjacent demes) | Model-fit $F_{ST}$<br>(500km) | Support<br>(log-BF) |
|-------------------------|------|------|-----------|--------|---------------------------|--------------------|----------|----------------------------------------|-------------------------------|---------------------|
| Afro-Eurasia            | AEA  | 4697 | 370       | 19972  | 686                       | 500                | 0.071    | 0.99%                                  | 0.99%                         | 254,472             |
| Central/Eastern Eurasia | CEA  | 2578 | 181       | 21045  | 1147                      | 240                | 0.042    | 0.22%                                  | 0.42%                         | 129,035             |
| Western Eurasia         | WEA  | 2049 | 122       | 26438  | 1437                      | 120                | 0.010    | 0.75%                                  | 1.08%                         | 46,210              |
| South-East Asia         | SEA  | 1054 | 58        | 7553   | 1388                      | 120                | 0.037    | 0.29%                                  | 0.56%                         | 13,654              |
| Africa                  | AFR  | 749  | 71        | 20984  | 694                       | 240                | 0.055    | 0.81%                                  | 1.18%                         | 51,771              |
| Southern Africa         | SAKS | 109  | 16        | 532343 | 227                       | 120                | 0.025    | 0.32%                                  | 0.62%                         | 2298                |
| KhoeSan                 |      |      |           |        |                           |                    |          |                                        |                               |                     |
| Southern Africa         | SAB  | 30   | 11        | 65095  | 227                       | 120                | 0.014    | 0.26%                                  | 0.56%                         | 126                 |
| Bantu                   |      |      |           |        |                           |                    |          |                                        |                               |                     |

542

543 **Extended Data Table 2:** Analysis Panels. Abb. Panel Abbreviation. Res. Avg. distance between grid  
544 points (in km) ; Support: log Bayes factor in favor of complex vs constant migration model. Implied  $F_{ST}$   
545 between adjacent demes based on posterior mean migration rates. Equation 19a from <sup>52</sup> is used to  
546 calculate implied  $F_{ST}$  using a torus approximation: For  $F_{ST}$  (adjacent demes):  $F_{ST}=(1+32m/S(d))^{-1}$  where  
547  $S(d)$  is a function of the distance between demes and given by equation A12 in <sup>52</sup>. In the first column, we  
548 use  $S(1)$ , in the second  $S(4)$  for highest and  $S(2)$  for medium resolution panels to get  $F_{ST}$  for demes at  
549 the lowest resolution (~500km).

550

551

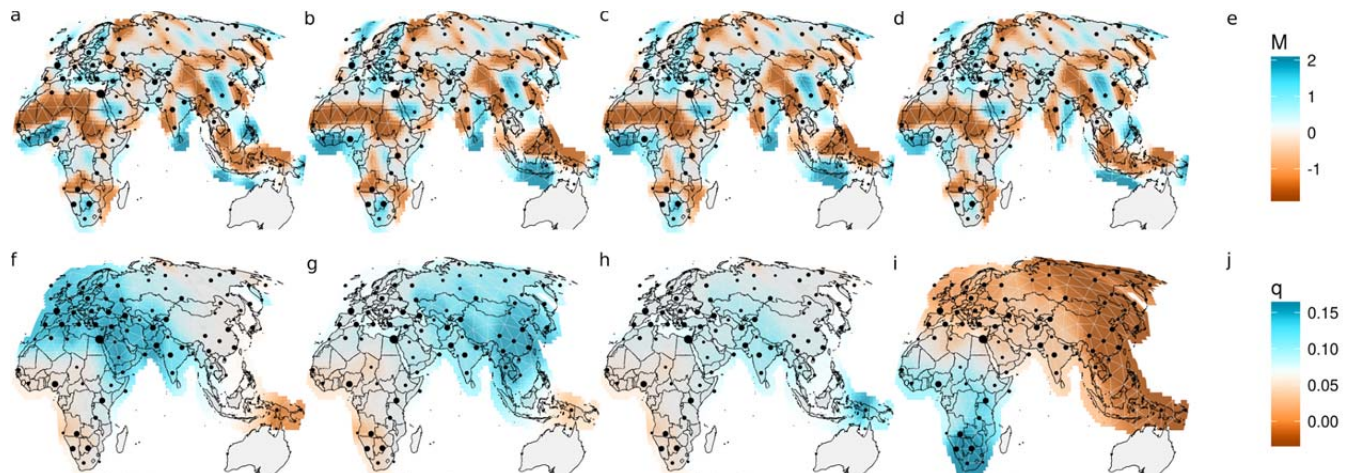

552

553

554 **Extended Data Figure 1:** Ascertainment bias. We run EEMS only using the Human Origin data  
555 <sup>25</sup>, using SNPs ascertained in a French (a/f), Chinese (b/g), Papuan (c/h) and San(d/i)  
556 individual. Migration rate surfaces (a-d) remain robust, whereas the within-deme diversity  
557 surfaces (f-i) show highest diversity at the respective ascertainment location. e/j: scale bars for  
558 migration rates and within-deme diversity rate parameters, respectively.

559

560

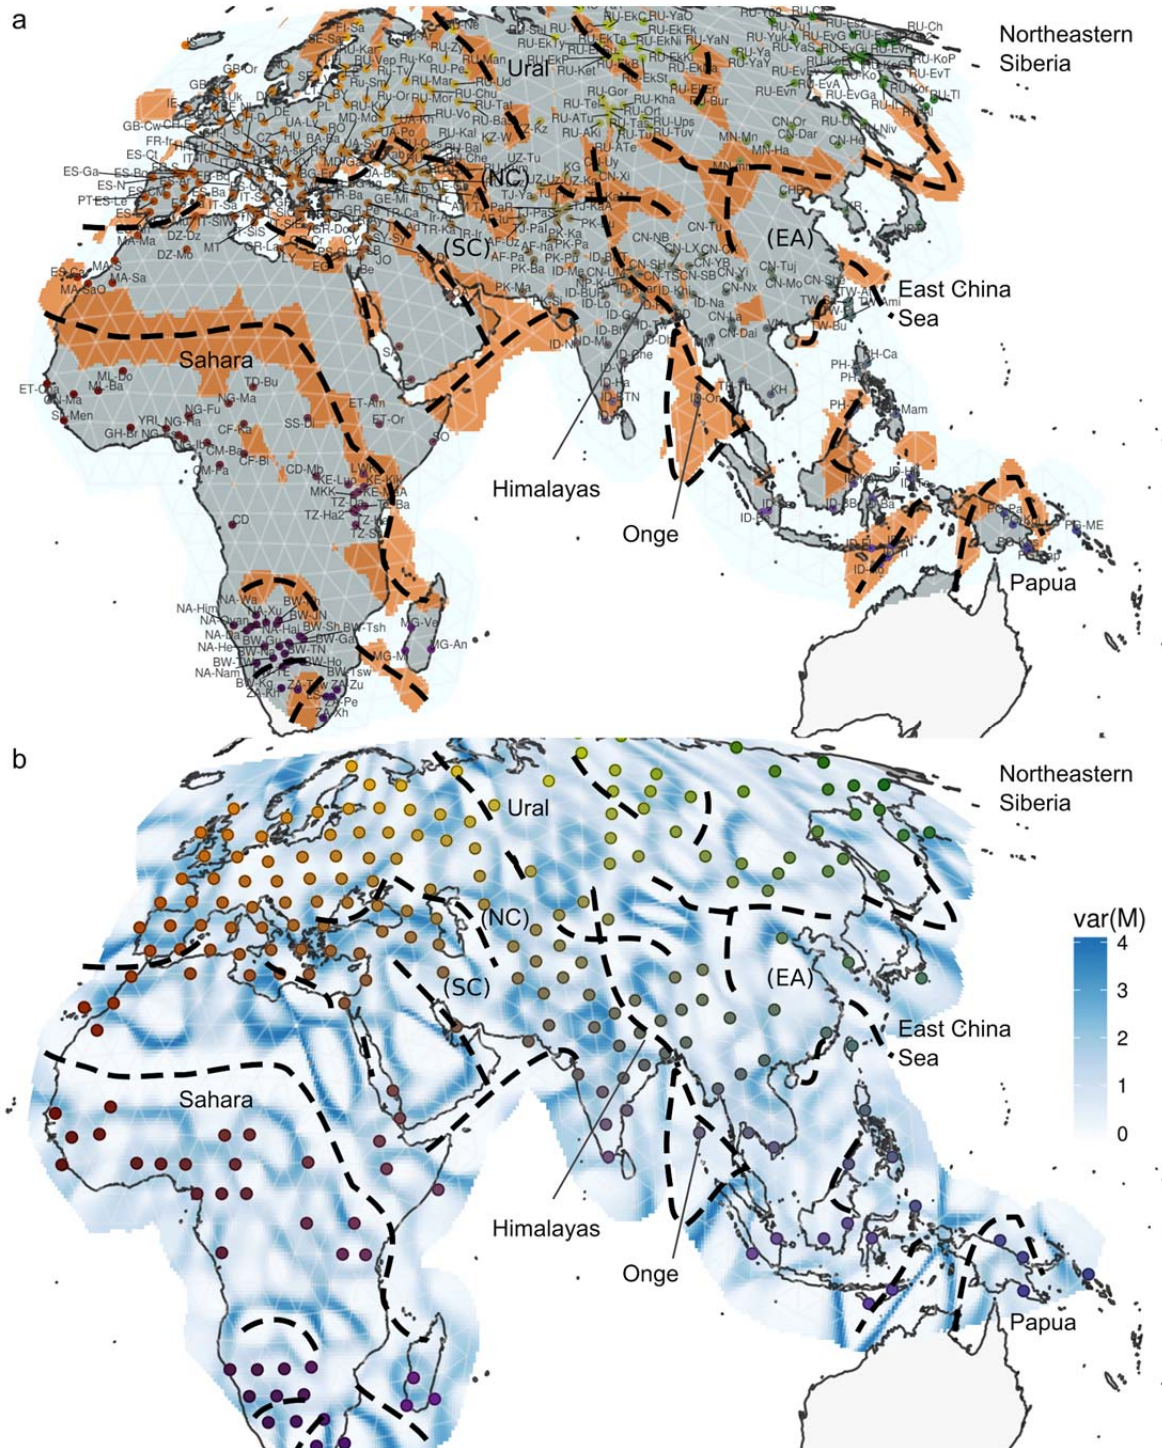

561  
562 **Extended Data Figure 2:** **a:** Location of troughs (below average migration rate in more than 95% of  
563 MCMC iterations) are given in brown. Sample locations and EEMS grid are displayed. **b:** Posterior  
564 variance on migration rate parameters. Note that most significant features are in low variance regions, but  
565 that they are often surrounded by high-variance regions, implying the exact boundary of troughs is  
566 estimated with uncertainty. Grid-fitted sample locations are displayed. Annotation in both panels is  
567 identical to Figure 1a.



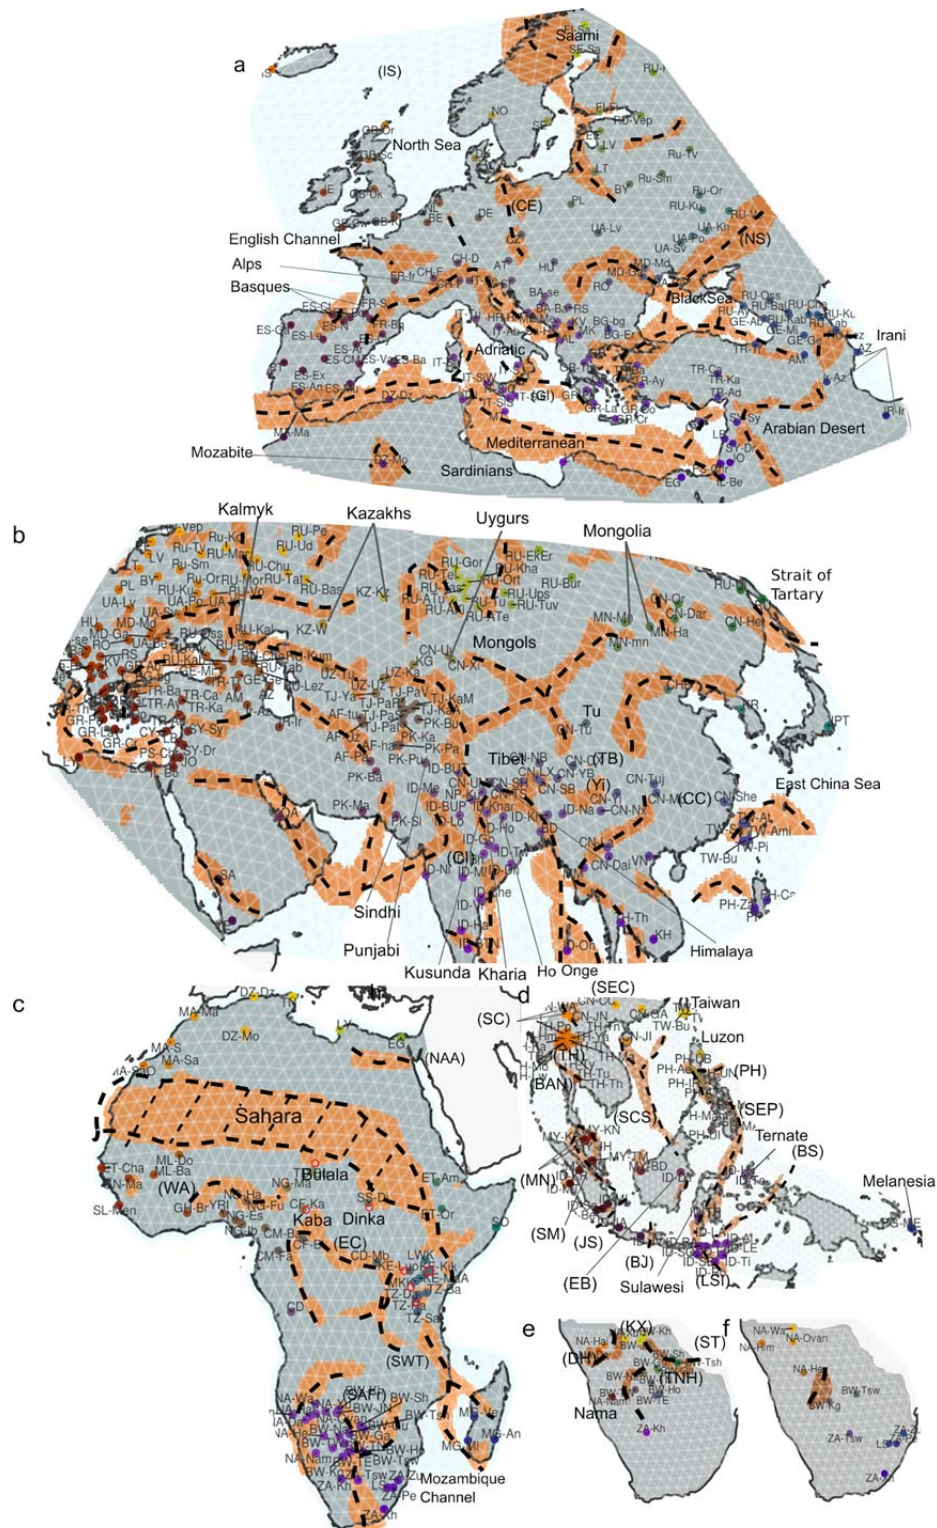

568  
 569 **Extended Data Figure 3:** Location of troughs (below average migration rate in more than 95%  
 570 of MCMC iterations) are given in brown. Sample locations and EEMS grid are displayed for a:  
 571 WEA b: CEA c: AFR d: SAHG and e: SEA analysis panels. Annotation in all panels is identical  
 572 to Figure 2.

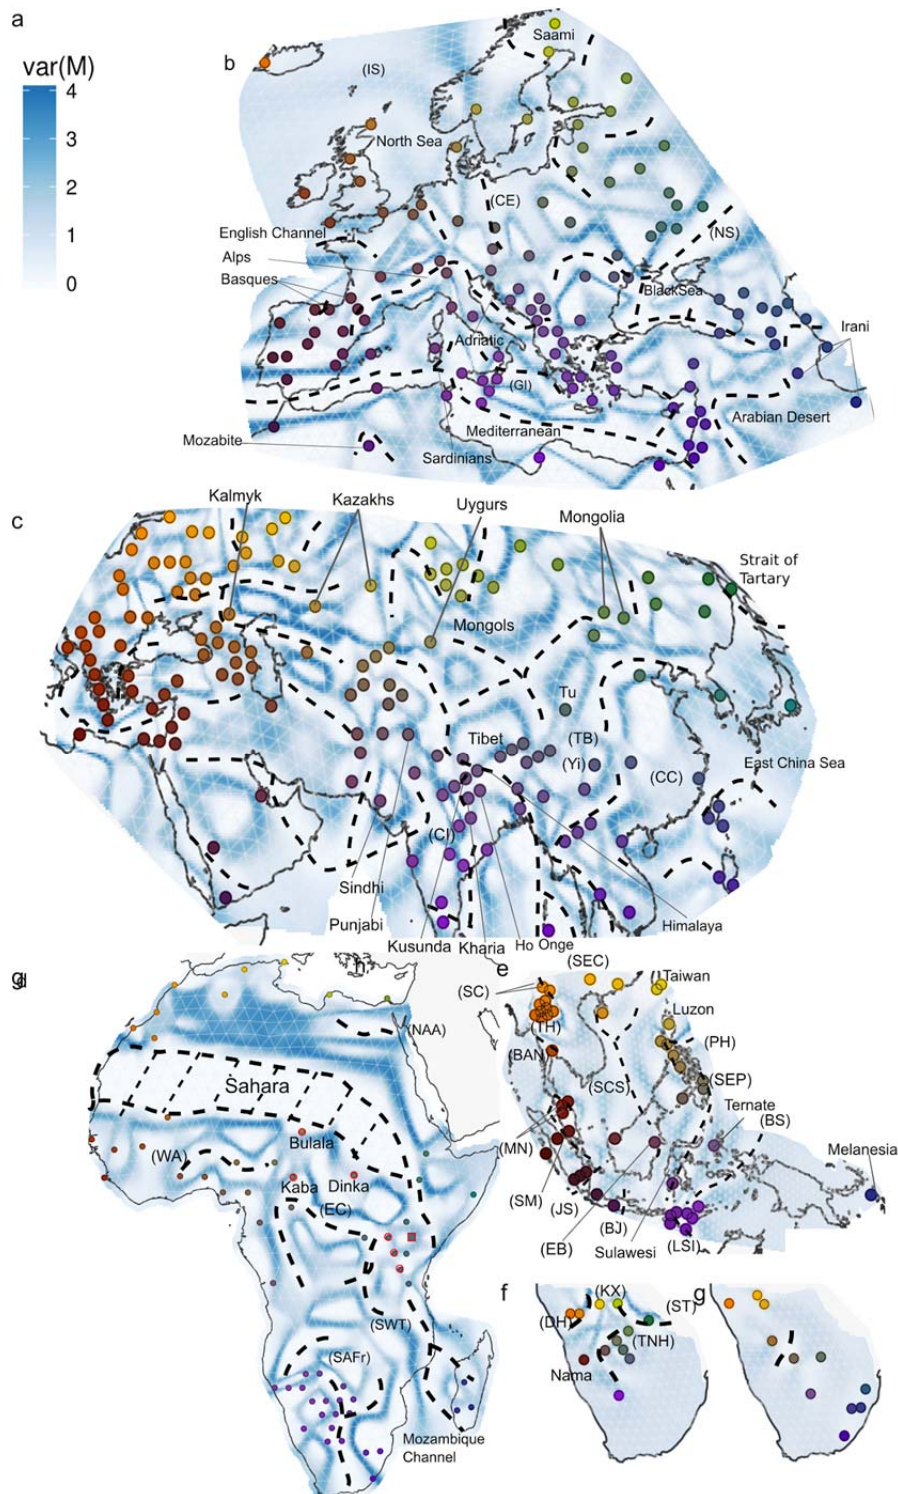

573  
 574 **Extended Data Figure 4:** Posterior variances in migration rate parameters. Grid-fitted sample  
 575 locations are displayed. **a:** scale bar **b:** WEA **c:** CEA **d:** AFR **e:** SAHG and **f:** SEA analysis  
 576 panels. Note that most significant features are in low variance regions, but that they are often  
 577 surrounded by high-variance regions, implying the exact boundary of troughs is estimated with  
 578 uncertainty. Annotation of troughs and select features is identical to Figure 2.



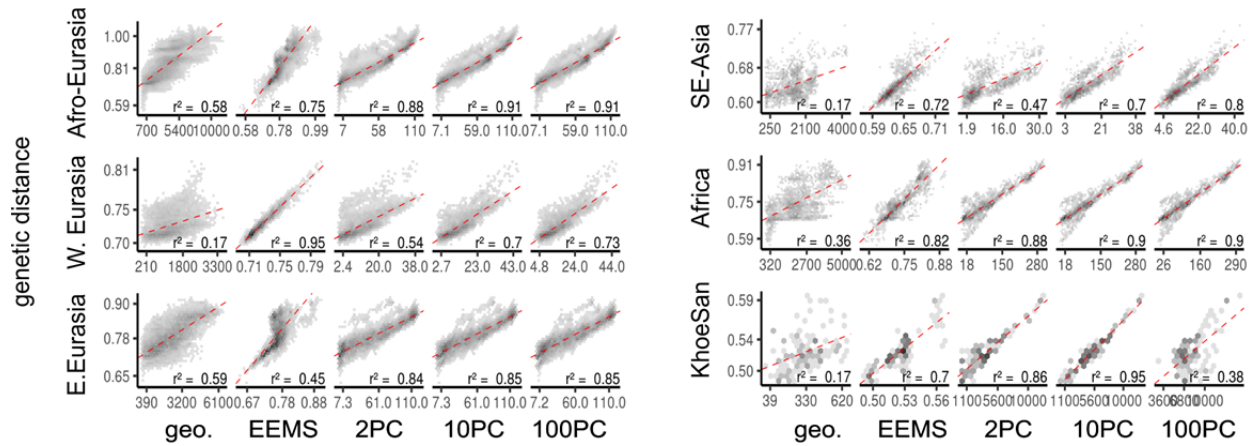

579  
580  
581  
582  
583  
584

**Extended Data Figure 5:** Hex-binned scatterplots of genetic distance versus geographic distance (in km), predicted distance via EEMS model fit, and predicted distance via a ten-component PCA, for all panels. Darker areas correspond to bins with more points. The fit of a simple linear regression (red dashed lines) and  $r^2$  are given.

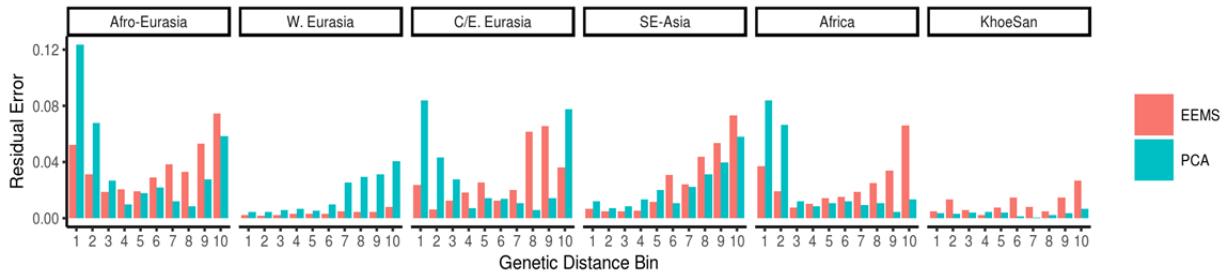

585  
586  
587  
588  
589  
590  
591  
592  
593

**Extended Data Figure 6:** Comparing Fit of PCA and EEMS. We show the relative error of EEMS (red) and PCA (blue, first 10 PCs) for all pairs, stratified by genetic distance. For each panel, all pairwise genetic distances were distributed in ten bins of equal size, for which we then computed the median absolute error of the fitted model vs the observed distances. For W. Eurasia and SE-Asia, EEMS fits uniformly better than PCA. In the Afro-Eurasian, Central/Eastern Eurasian and African panel, EEMS fits better for smaller distances, but the fit is worse for larger distances. For the KhoeSan, EEMS fits worse than PCA for all distance bins.

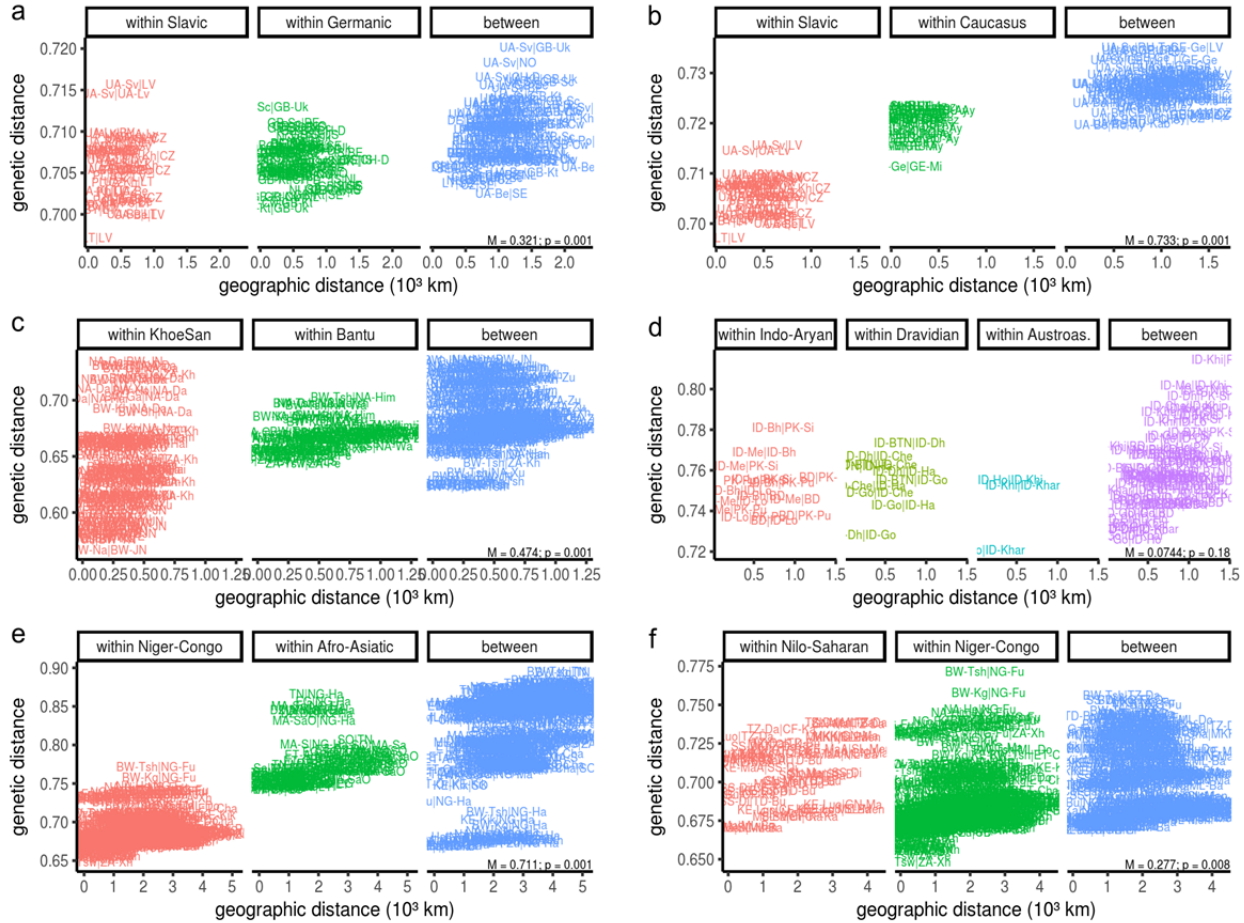

594

595

596 **Extended Data Figure 7: Genetic vs. geographic distance within and between language**

597 **groups.** The eems-plots revealed several troughs aligning with differences in linguistic groups.

598 We show the pairwise relationship of genetic and geographic differences within- and between

599 adjacent language groups mentioned in the main text for a. Slavic and Germanic speakers

600 (Southern Africa) d. Indo-Aryan, Dravidian and Austroasiatic (CEA) e. Niger-Congo and Afro

601 Asiatic (AFR) and f. Nilo-Saharan and Niger-Congo (AFR).

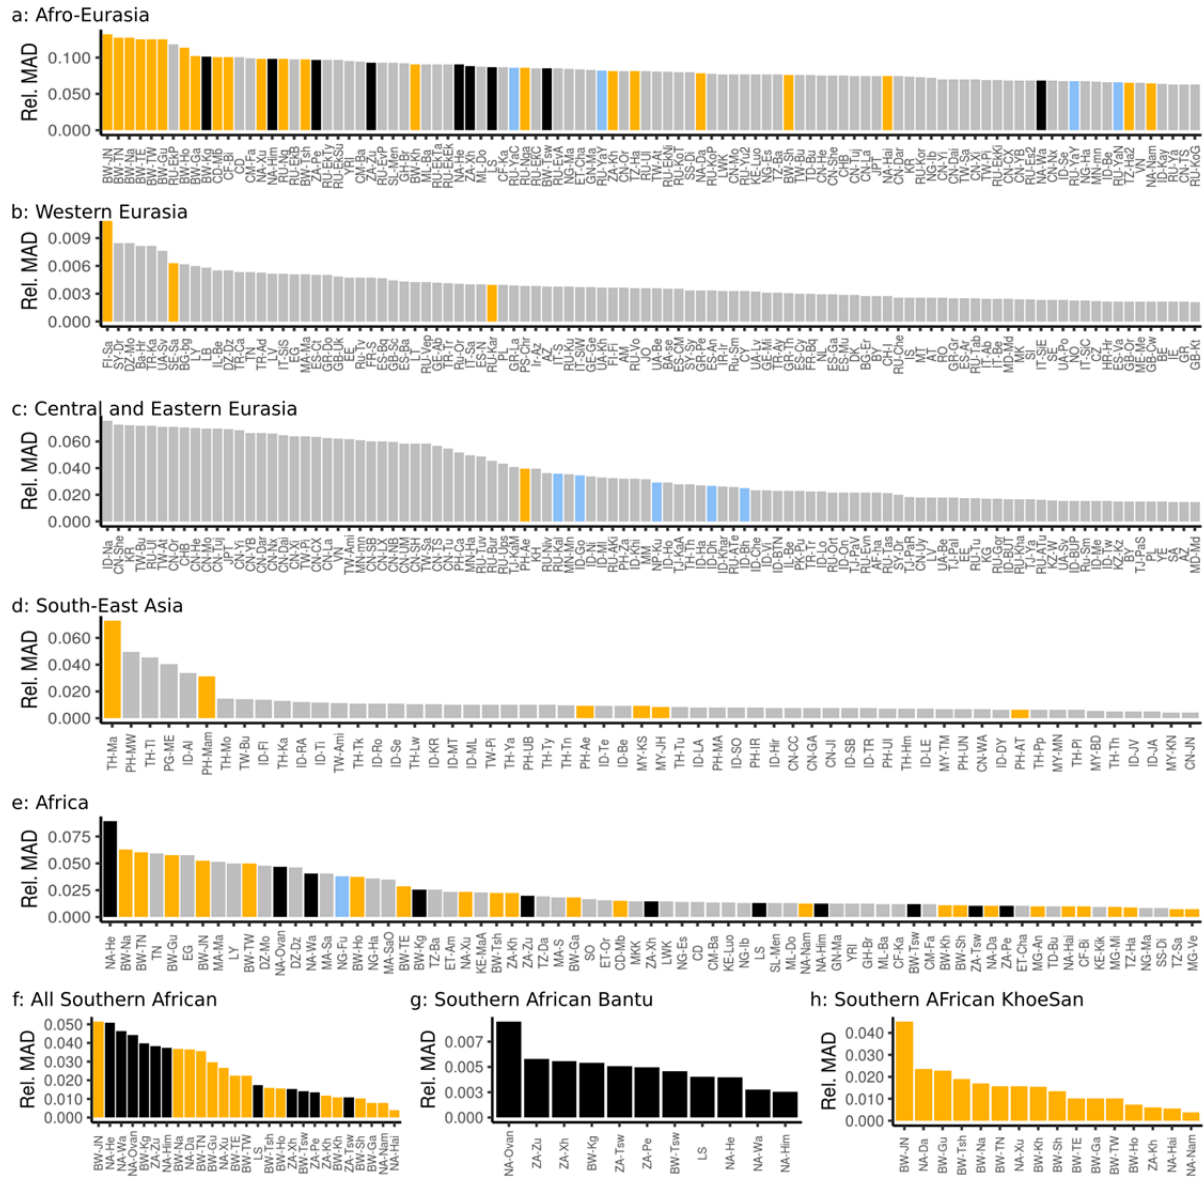

602  
 603 **Extended Data Figure 8: EEMS-fit residuals.** For each population, we show the median  
 604 absolute deviation (MAD) of the observed vs EEMS-fitted genetic distances, normalized by the  
 605 median distance for this population. yellow: Hunter-Gatherers; Black: Southern African Bantu  
 606 speakers; Blue: Populations with a recent admixture or displacement.

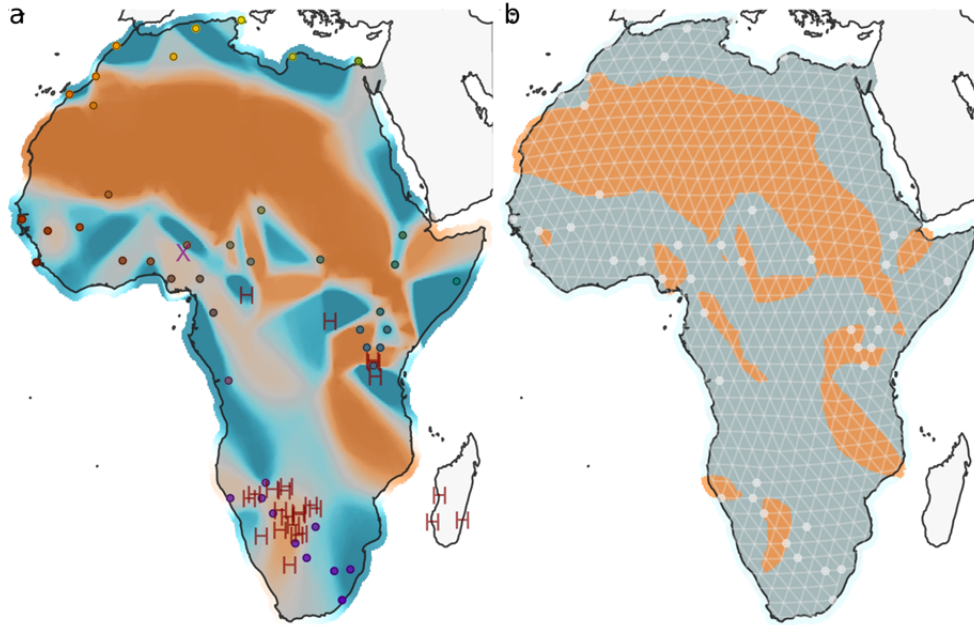

607  
608 **Extended Data Figure 9: Alternative Africa analysis.** To assess the effect of populations that  
609 may not be modelled well by EEMS (admixed or hunter-gatherer populations), we provide  
610 supplemental analyses of Africa with several populations excluded from the model fit. **a:** EEMS-  
611 map and **b:** location of troughs for Africa. Excluded populations are annotated with H (Hunter-  
612 gatherers) and X (admixed). With this filtering (in particular removing the Hadza and Sandawe),  
613 the Eastern African trough between Afro-Asiatic speakers and Nilo-Saharan / Niger-Congo  
614 speakers (seen in Figures 1 and 2g) vanishes.

615  
616  
617  
618



## 619 Additional References

- 620 34. Köster, J. & Rahmann, S. Snakemake--a scalable bioinformatics workflow engine. *Bioinformatics* **28**, 2520–2522 (2012).
- 621 35. Chang, C. C. *et al.* Second-generation PLINK: rising to the challenge of larger and richer datasets. *Gigascience* **4**, 7 (2015).
- 622 36. Yunusbayev, B. *et al.* The Genetic Legacy of the Expansion of Turkic-Speaking Nomads across Eurasia. *PLoS Genet.* **11**,
- 623 e1005068 (2015).
- 624 37. HUGO Pan-Asian SNP Consortium. Mapping human genetic diversity in Asia. *Science* **326**, 1541–1545 (2009).
- 625 38. Xing, J. *et al.* Toward a more uniform sampling of human genetic diversity: a survey of worldwide populations by high-density
- 626 genotyping. *Genomics* **96**, 199–210 (2010).
- 627 39. Nelson, M. R. *et al.* The Population Reference Sample, POPRES: a resource for population, disease, and pharmacological
- 628 genetics research. *Am. J. Hum. Genet.* **83**, 347–358 (2008).
- 629 40. Bryc, K. *et al.* Genome-Wide Patterns of Population Structure and Admixture in West Africans and African Americans. *Proc.*
- 630 *Natl. Acad. Sci. U. S. A.* (2009). doi:10.1073/pnas.0909559107
- 631 41. Hunter-Zinck, H. *et al.* Population genetic structure of the people of Qatar. *Am. J. Hum. Genet.* **87**, 17–25 (2010).
- 632 42. Reich, D. *et al.* Denisova admixture and the first modern human dispersals into Southeast Asia and Oceania. *Am. J. Hum.*
- 633 *Genet.* (2011).
- 634 43. Paschou, P. *et al.* Maritime route of colonization of Europe. *Proc. Natl. Acad. Sci. U. S. A.* **111**, 9211–9216 (2014).
- 635 44. Jeong, C. *et al.* A longitudinal cline characterizes the genetic structure of human populations in the Tibetan plateau. *PLoS One*
- 636 **12**, e0175885 (2017).
- 637 45. Bigham, A. *et al.* Identifying Signatures of Natural Selection in Tibetan and Andean Populations Using Dense Genome Scan
- 638 Data. *PLoS Genet.* **6**, e1001116 (2010).
- 639 46. Xu, S. *et al.* A genome-wide search for signals of high-altitude adaptation in Tibetans. *Mol. Biol. Evol.* **28**, 1003–1011 (2011).
- 640 47. Hammarström, H., Bank, S., Forkel, R. & Haspelmath, M. Glottolog 3.2. (2018).
- 641 48. Oksanen, J. *et al.* The vegan package. *Community ecology package* **10**, 631–637 (2007).
- 642 49. Guillot, G. & Rousset, F. Dismantling the Mantel tests. *Methods Ecol. Evol.* **4**, 336–344 (2013).
- 643 50. Behar, D. M. *et al.* The genome-wide structure of the Jewish people. *Nature* **466**, 238–242 (2010).
- 644 51. Abraham, G. & Inouye, M. Fast principal component analysis of large-scale genome-wide data. *PLoS One* **9**, e93766 (2014).
- 645 52. Slatkin, M. Inbreeding coefficients and coalescence times. *Genetic Research* **58**, 167–175 (1991).
- 646 53. Sahr, K., White, D. & Kimerling, A. J. Geodesic Discrete Global Grid Systems. *Cartogr. Geogr. Inf. Sci.* **30**, 121–134 (2003).
- 647 54. Haak, W. *et al.* Massive migration from the steppe was a source for Indo-European languages in Europe. *Nature* **522**, 207–211
- 648 (2015).
- 649 55. Allentoft, M. E. *et al.* Population genomics of Bronze Age Eurasia. *Nature* **522**, 167–172 (2015).
- 650 56. Rasmussen, M. *et al.* An Aboriginal Australian Genome Reveals Separate Human Dispersals into Asia. *Science* **334**, 94–98
- 651 (2011).
- 652 57. Duggan, A. T. & Stoneking, M. Recent developments in the genetic history of East Asia and Oceania. *Curr. Opin. Genet. Dev.*
- 653 **29**, 9–14 (2014).

- 654 58. Campbell, M. C. & Tishkoff, S. A. African genetic diversity: implications for human demographic history, modern human origins,  
655 and complex disease mapping. *Annu. Rev. Genomics Hum. Genet.* **9**, 403–433 (2008).
- 656 59. Bryc, K. *et al.* Genome-wide patterns of population structure and admixture in West Africans and African Americans. *Proc. Natl.*  
657 *Acad. Sci. U. S. A.* **107**, 786–791 (2010).
- 658 60. Tishkoff, S. A. *et al.* The genetic structure and history of Africans and African Americans. *Science* **324**, 1035–1044 (2009).
- 659 61. Pickrell, J. K. *et al.* The genetic prehistory of southern Africa. *Nat. Commun.* **3**, 1143 (2012).
- 660 62. Uren, C. *et al.* Fine-Scale Human Population Structure in Southern Africa Reflects Ecogeographic Boundaries. *Genetics* **204**,  
661 303–314 (2016).
- 662 63. Behar, D. M. *et al.* No evidence from genome-wide data of a Khazar origin for the Ashkenazi Jews. *Hum. Biol.* **85**, 859–900  
663 (2013).
- 664 64. Chaubey, G. *et al.* Population Genetic Structure in Indian Austroasiatic Speakers: The Role of Landscape Barriers and Sex-  
665 Specific Admixture. *Mol. Biol. Evol.* **28**, 1013–1024 (2011).
- 666 65. Cardona, A. *et al.* Genome-Wide Analysis of Cold Adaptation in Indigenous Siberian Populations. *PLoS One* **9**, e98076 (2014).
- 667 66. Di Cristofaro, J. *et al.* Afghan Hindu Kush: where Eurasian sub-continent gene flows converge. *PLoS One* **8**, e76748 (2013).
- 668 67. Fedorova, S. A. *et al.* Autosomal and uniparental portraits of the native populations of Sakha (Yakutia): implications for the  
669 peopling of Northeast Eurasia. *BMC Evol. Biol.* **13**, 127 (2013).
- 670 68. Kovacevic, L. *et al.* Standing at the Gateway to Europe - The Genetic Structure of Western Balkan Populations Based on  
671 Autosomal and Haploid Markers. *PLoS One* **9**, e105090 (2014).
- 672 69. Lazaridis, I. *et al.* Ancient human genomes suggest three ancestral populations for present-day Europeans. *Nature* **513**, 409–  
673 413 (2014).
- 674 70. Metspalu, M. *et al.* Shared and Unique Components of Human Population Structure and Genome-Wide Signals of Positive  
675 Selection in South Asia. *Am. J. Hum. Genet.* **89**, 731–744 (2011).
- 676 71. Migliano, A. *et al.* Evolution of the Pygmy Phenotype: Evidence of Positive Selection from Genome-wide Scans in African,  
677 Asian, and Melanesian Pygmies. *Hum. Biol.* **85**, (2013).
- 678 72. Pierron, D. *et al.* Genome-wide evidence of Austronesian–Bantu admixture and cultural reversion in a hunter-gatherer group of  
679 Madagascar. *Proc. Natl. Acad. Sci. U. S. A.* **111**, 936–941 (2014).
- 680 73. Raghavan, M. *et al.* Upper Palaeolithic Siberian genome reveals dual ancestry of Native Americans. *Nature* **505**, 87–91 (2014).
- 681 74. Rasmussen, M. *et al.* Ancient human genome sequence of an extinct Palaeo-Eskimo. *Nature* **463**, 757–762 (2010).
- 682 75. Reich, D. *et al.* Denisova Admixture and the First Modern Human Dispersals into Southeast Asia and Oceania. *Am. J. Hum.*  
683 *Genet.* **89**, 516–528 (2011).
- 684 76. Skoglund, P. *et al.* Genomic Diversity and Admixture Differs for Stone-Age Scandinavian Foragers and Farmers. *Science* **344**,  
685 747–750 (2014).
- 686 77. Yunusbayev, B. *et al.* The Caucasus as an Asymmetric Semipermeable Barrier to Ancient Human Migrations. *Mol. Biol. Evol.*  
687 **29**, 359–365 (2012).

688
